# Supplementary material for: Interpreting whole genome and exome sequencing data of individual gastric cancer samples
Source: PubMed Central journal article supplement (PMC5501078; doi:10.1186/s12864-017-3895-z), 2017-07-06
Supplement: 12864_2017_3895_MOESM2_ESM.pdf [file 12864_2017_3895_MOESM2_ESM.pdf]

## Additional File 2

### Interpreting whole genome and exome sequencing data of individual gastric cancer samples

Daniela Esser<sup>1,4</sup>, Niklas Holze<sup>2</sup>, Jochen Haag<sup>2</sup>, Stefan Schreiber<sup>1,3</sup>, Sandra Krüger<sup>2</sup>, Viktoria Warneke<sup>2</sup>, Philip Rosenstiel<sup>1†</sup> and Christoph Röcken<sup>2\*†</sup>

<sup>1</sup> Institute for Clinical Molecular Biology, Christian-Albrechts-University, 24105 Kiel, Germany

<sup>2</sup> Institute for Pathology, Christian-Albrechts-University, 24105 Kiel, Germany

<sup>3</sup> Department of General Internal Medicine, University Hospital Schleswig-Holstein, 24105 Kiel, Germany

<sup>4</sup> Institute for Experimental Medicine, Christian-Albrechts-University, 24105 Kiel, Germany

#### Table S1

Polymerase chain reaction and sequencing primers used for validation of single nucleotide variations.

#### Table S2

Somatic single nucleotide variations (SNVs). The following abbreviations were used: chr = chromosome, pos = chromosomal position, gene = affected gene, effect = effect of SNV on amino acid, ref nt = annotated nucleotide in reference sequence, observ. nt = called allele, ref aa = amino acid in reference, observ. aa = amino acid based on sequence with SNV, pos aa = position of amino acid within the gene, Sift = Sift damaging prediction score, PolyPhen = PolyPhen2 damaging prediction score, PhyloP = PhyloP conservation score, ECS = conservation score based on exonic regions of the gene, 1000G freq = frequency of SNV within the 1000 Genomes project, g-st = information, if SNV was called with Samtools in the genome sequencing data, e-st = information, if SNV was called with Samtools in the exome

sequencing data, e-bs = information, if SNV was called with DiBayes / Bioscope in the exome sequencing data, cosmic=information whether the gene is listed in the cancer gene consensus list of the COSMIC database. (<http://cancer.sanger.ac.uk/census>) (A-B) Novel SNVs filtered by quality: All SNVs were called in the exome with Samtools and DiBayes / Bioscope and in the genome data with Samtools. Furthermore, all SNVs were supported by more than 20% of the high quality bases and were predicted as damaging by either PolyPhen2 or Sift. (C-D) Novel SNVs, which were called with at least one caller, supported by more than 5% of the reads in the genome as well as in the exome tumor data and existing in maximum 5% of the reads in the genome as well as in the exome data of the matching control samples. Furthermore, all SNVs result (i) in a nonsense amino acid change or (ii) were predicted as damaging by Sift or PolyPhen2 and were either at a conserved position (PhyloP) or in a conserved gene (ECS). (E-F) Novel SNVs, which were called with at least one caller and resulting either in a nonsense amino acid change or were predicted as damaging by Sift or PolyPhen2 or were at a conserved position or in a conserved gene.

### **Table S3**

Filtered somatic small indels. The following abbreviations were used: chr = chromosome, start = start position, end = end position, gene = affected gene, type = type of indel: insertion/deletion and effect on reading frame, ref nt = nucleotides in reference sequence, observed nt = called bases, ref aa = amino acid based on reference sequence, aa pos = position of amino acid within the gene, called in exome? = information whether indel was called in the exome data, called in the genome? = information whether indel was called in the genome data, cosmic =

information whether the gene is listed in the cancer gene consensus list of the COSMIC database.

**Table S4**

Somatic intragenic large structural variants. (A-B) Inversions. (C-D) Interchromosomal translocations: Intersecting translocations having breakpoints closer than 25,000 bp to each other were merged to one entry. (E-F) Large deletions: All genes having deletions (>5bp) with a total length larger 40bp.

**Table S5**

Clinico-pathological characteristics of patients with a *GNAS*-mutation.

**Table S6**

SNVs with failed validations using Pyromark sequencing. All variants were called in the MSI WES data, but not in the WGS data. The table shows the mutant allele fractions based on all sequencing data sets.

**Table S7**

SNVs with failed validations using Pyromark sequencing. All variants were called in the MSS WES data, but not in the WGS data. The table shows the mutant allele fractions based on all sequencing data sets.

**Table S8**

Putative positions for large insertions. Exclusively positions with adjacent gene closer than 100kb are reported

**Table S9**

Number of called raw somatic SNVs (not quality filtered, inter- and intragenic, synonymous + non-synonymous, etc.). In this case, somatic means that the SNV was not detected in the corresponding non-tumor samples sequenced with the same technology.

Table S1 PCR and sequencing primers used for validation of SNVs

| <b>Gene</b> | <b>Mutation</b> | <b>Primer</b>     | <b>Sequence</b>                |
|-------------|-----------------|-------------------|--------------------------------|
| DROSHA      | p.Q1089X        | DROSHA-PCR-for    | 5'-GGGAGAAGGAATTTTACAAAACAC-3' |
|             |                 | DROSHA-PCR-rev    | 5'-TCCAATTGCTTCTTCAAACCTCA-3'  |
|             |                 | DROSHA-Sequencing | 5'-TATTTCTATTTTCCTGTAGC-3'     |
| MSH4        | p.A174T         | MSH4-PCR-for      | 5'-TTGTAGAAGGGAGAGGACTTGC-3'   |
|             |                 | MSH4-PCR-rev      | 5'-CCTTTGCATATGTTGTGTTGTCTG-3' |
|             |                 | MSH4-Sequencing   | 5'-GTTTTTTAAATCAATACTTG-3'     |
| RERE        | p.Q500X         | RERE-PCR-for      | 5'-CCCACCCCACTATGTGC-3'        |
|             |                 | RERE-PCR-rev      | 5'-GGCAGGCGTACCCCTTCA-3'       |
|             |                 | RERE-Sequencing   | 5'-TACCCCTTCAGCTCC-3'          |
| ROS1        | p.Q925R         | ROS1-PCR-for      | 5'-CTCTGTTTTGGAACCAGCCAGATT-3' |
|             |                 | ROS1-PCR-rev      | 5'-AGGGGCTTAAGGGATGTCTGAATA-3' |
|             |                 | ROS1-Sequencing   | 5'-GAACCAGCCAGATTTAAT-3'       |
| TACC2       | p.T502M         | TACC2-PCR-for     | 5'-TTGAGATCCCAGCCAGTGCTAT-3'   |
|             |                 | TACC2-PCR-rev     | 5'-CTTACCACCTCCACCCCTGAA-3'    |
|             |                 | TACC2-Sequencing  | 5'-TGAACTTACGTCTTTAGGG-3'      |
| TYRO3       | p.R333H         | TYRO-PCR-for      | 5'-AGGGCAGGGGTCTTAGCAATCT-3'   |
|             |                 | TYRO-PCR-rev      | 5'-ACTTCTTCCCACTCCAAGATGAGG-3' |
|             |                 | TYRO-Sequencing   | 5'-TGAGGCCTGAATCTGT-3'         |

Table S2 A: High quality SNVs patient 1

| chr | pos       | gene   | effect    | ref nt | observed nt | ref aa | observed aa | pos aa | Sift | PolyPhen | PhyloP | ECS    | 1000G freq | g-st | e-st | e-bs |
|-----|-----------|--------|-----------|--------|-------------|--------|-------------|--------|------|----------|--------|--------|------------|------|------|------|
| 1   | 8424848   | RERE   | nonsense  | G      | A           | Q      | X           | 500    | 0.17 | 0.74     | 0.9996 | 0.1114 | 0.1114     | yes  | yes  | yes  |
| 5   | 31423048  | DROSHA | nonsense  | G      | A           | Q      | X           | 1052   | 0.01 |          |        | 0.6416 | 0.6416     | yes  | yes  | yes  |
| 7   | 150647363 | KCNH2  | nonsynony | G      | A           | P      | L           | 424    | 0.00 | 0.95     | 0.9987 | 0.3248 | 0.3248     | yes  | yes  | yes  |
| 19  | 49713590  | TRPM4  | nonsyn    | C      | T           | R      | C           | 941    | 0.02 | 1.00     | 0.9989 | 0.1508 | 0.1508     | yes  | yes  | yes  |
| 21  | 43708011  | ABCG1  | nonsyn    | C      | T           | A      | V           | 329    | 0.03 | 0.14     | 0.9968 | 0.0142 | 0.0142     | yes  | yes  | yes  |

Table S2 B: High quality SNVs patient 2

| chr | pos       | gene | effect   | ref nt | observed nt | ref aa | observed aa | pos aa | Sift | PolyPhen | PhyloP | ECS    | 1000G freq | g-st | e-st | e-bs |
|-----|-----------|------|----------|--------|-------------|--------|-------------|--------|------|----------|--------|--------|------------|------|------|------|
| 14  | 100363521 | EML1 | nonsense | C      | G           | Y      | X           | 239    | 0.00 | 0.74     | 0.9984 | 1.7618 |            | yes  | yes  | yes  |

Table S2 C SNV table patient 1 (damaging & conserved)

| chr | pos       | gene      | effect   | ref nt | observ. nt | ref aa | observ. aa | pos aa | Sift | PolyPhen | PhyloP | ECS    | g-st | e-st | e-bs | cosmic |
|-----|-----------|-----------|----------|--------|------------|--------|------------|--------|------|----------|--------|--------|------|------|------|--------|
| 1   | 8424848   | RERE      | nonsense | G      | A          | Q      | X          | 500    | 0.17 | 0.74     | 0.9996 | 0.1114 | yes  | yes  | yes  | no     |
| 1   | 14108317  | PRDM2     | nonsyn   | G      | A          | D      | N          | 1142   | 0    | 0.7      | 0.9998 | 2.0446 | no   | no   | yes  | no     |
| 1   | 19449524  | UBR4      | nonsyn   | G      | A          | R      | C          | 3207   | 0    | 1        | 0.9996 | 0.4922 | yes  | no   | no   | no     |
| 1   | 26448895  | PDIK1L    | nonsyn   | G      | A          | E      | K          | 285    | 0.01 | 1        | 0.9997 | 0.0012 | no   | no   | yes  | no     |
| 1   | 76272758  | MSH4      | nonsyn   | G      | A          | A      | T          | 174    | 0    | 1        | 0.9997 | 1.0239 | no   | no   | yes  | no     |
| 1   | 149859238 | HIST2H2AB | nonsyn   | T      | C          | T      | A          | 77     |      | 0.57     | 0.9976 | 0      | yes  | no   | no   | no     |
| 1   | 156268899 | VHLL      | nonsense | C      | A          | E      | X          | 28     |      | 0.45     | 0.2208 | 0.0443 | no   | no   | yes  | no     |
| 1   | 161011635 | USF1      | nonsyn   | G      | A          | A      | V          | 93     | 0.01 | 0.06     | 0.9996 | 0.0094 | no   | yes  | yes  | no     |
| 1   | 183095328 | LAMC1     | nonsyn   | G      | A          | G      | S          | 959    | 0    | 0.99     | 0.9997 | 1.3632 | no   | no   | yes  | no     |

|    |           |          |          |   |   |   |   |      |      |      |        |        |     |     |     |     |
|----|-----------|----------|----------|---|---|---|---|------|------|------|--------|--------|-----|-----|-----|-----|
| 2  | 100623269 | AFF3     | nonsyn   | G | A | A | V | 258  | 0    | 0.96 | 0.9996 | 1.0244 | no  | no  | yes | yes |
| 3  | 33427020  | FBXL2    | nonsyn   | G | A | A | T | 330  | 0    | 0.93 | 0.9998 | 0.0168 | yes | no  | no  | no  |
| 3  | 52548457  | STAB1    | nonsyn   | G | A | R | H | 1208 | 0.01 | 0.99 | 0.9996 | 2.9546 | yes | no  | no  | no  |
| 3  | 107517481 | BBX      | nonsyn   | G | T | S | I | 792  | 0    | 1    | 0.9998 | 0.048  | yes | no  | no  | no  |
| 3  | 122003133 | CASR     | nonsyn   | G | A | G | S | 778  | 0.04 | 0.98 | 0.9997 | 1.8264 | no  | no  | yes | no  |
| 3  | 178936082 | PIK3CA   | nonsyn   | G | A | E | K | 542  | 0.04 | 0.89 | 0.9997 | 0.2407 | no  | no  | yes | yes |
| 4  | 111397920 | ENPEP    | nonsyn   | G | A | G | D | 117  | 0    | 1    | 0.9997 | 2.3104 | no  | no  | yes | no  |
| 5  | 31423048  | DROSHA   | nonsense | G | A | Q | X | 1052 | 0.01 |      |        | 0.6416 | yes | yes | yes | yes |
| 5  | 177642326 | AGXT2L2  | nonsense | G | A | Q | X | 345  | 0.35 | 0.69 | 0.9767 | 0.3738 | yes | no  | no  | no  |
| 7  | 99797878  | STAG3    | nonsyn   | G | T | R | L | 566  | 0    | 0.18 | 0.9997 | 0.6811 | yes | no  | no  | no  |
| 9  | 5126730   | JAK2     | nonsyn   | G | A | R | H | 1113 | 0    | 1    | 0.9995 | 0.0818 | yes | no  | no  | yes |
| 9  | 104356830 | PPP3R2   | nonsyn   | G | A | T | M | 128  | 0.01 | 0    | 0.1469 | 0.0099 | yes | no  | no  | no  |
| 9  | 115805897 | ZFP37    | nonsense | G | T | S | X | 334  | 0.04 | 0.74 | 0.9994 | 1.8508 | no  | no  | yes | no  |
| 9  | 127298179 | NR6A1    | nonsyn   | G | A | P | S | 348  | 0.02 | 1    | 0.9997 | 0.0768 | yes | no  | no  | no  |
| 9  | 129594868 | ZBTB43   | nonsyn   | G | A | R | H | 27   | 0    | 0.98 | 0.9998 | 0.0047 | yes | no  | no  | no  |
| 10 | 12191899  | SEC61A2  | nonsyn   | C | T | T | M | 112  | 0.04 | 0.25 | 0.998  | 0.0064 | yes | no  | no  | no  |
| 11 | 12183953  | MICAL2   | nonsyn   | G | A | C | Y | 84   | 0    | 1    | 0.9998 | 0.3538 | yes | no  | no  | no  |
| 11 | 73022234  | ARHGEF17 | nonsense | C | T | R | X | 851  | 1    | 0.72 | 0.8847 | 0.6167 | no  | no  | yes | no  |
| 12 | 56755353  | APOF     | nonsense | G | A | R | X | 213  | 1    |      |        | 1.0174 | yes | no  | no  | no  |
| 12 | 69981309  | CCT2     | nonsense | C | T | R | X | 10   | 1    | 0.73 | 0.9863 | 0.1673 | yes | no  | no  | no  |
| 12 | 109278801 | DAO      | nonsyn   | G | A | G | R | 7    | 0    | 1    | 0.9995 | 0.0704 | yes | no  | no  | no  |
| 14 | 24839069  | NFATC4   | nonsense | C | A | Y | X | 155  | 0    | 0.6  | 0.177  | 1.3149 | no  | no  | yes | no  |
| 15 | 64506145  | CSNK1G1  | nonsyn   | T | G | H | P | 208  | 0    | 1    | 0.9985 | 0.0076 | no  | no  | yes | no  |
| 18 | 18619508  | ROCK1    | nonsense | G | A | R | X | 326  |      | 0.73 | 0.99   | 0.136  | yes | no  | no  | no  |
| 18 | 31432849  | NOL4     | nonsyn   | C | T | R | Q | 340  | 0    | 0.79 | 0.9991 | 0.0073 | no  | no  | yes | no  |
| 19 | 9271885   | ZNF317   | nonsense | C | T | R | X | 490  | 1    | 0.7  | 0.7709 | 0.4575 | yes | no  | no  | no  |
| 20 | 16486763  | KIF16B   | nonsyn   | G | A | R | C | 258  | 0    | 1    | 0.9996 | 1.5824 | yes | no  | no  | no  |
| 20 | 31671526  | BPIFB4   | nonsense | G | T | G | X | 175  | 0.03 | 0.73 | 0.9977 | 11.229 | no  | no  | yes | no  |
| 20 | 43243244  | PKIG     | nonsyn   | G | A | R | Q | 16   | 0.04 | 1    | 0.9996 | 0.0157 | yes | no  | no  | no  |

|    |           |         |        |   |   |   |   |     |      |      |        |        |    |     |     |    |
|----|-----------|---------|--------|---|---|---|---|-----|------|------|--------|--------|----|-----|-----|----|
| 20 | 62560874  | DNAJC5  | nonsyn | C | T | A | V | 106 | 0.15 | 0.9  | 0.9989 | 0      | no | no  | yes | no |
| X  | 24552101  | PDK3    | nonsyn | G | A | R | H | 378 | 0    | 0.98 | 0.9997 | 0.0114 | no | yes | yes | no |
| X  | 106459930 | CXorf41 | nonsyn | G | T | M | I | 61  | 0.34 | 1    | 0.9692 | 0.0029 | no | no  | yes | no |

Table S2 D: SNV table patient 2 (damaging & conserved)

| chr | pos       | gene   | effect   | ref nt | observ. nt | ref aa | observ. aa | pos aa | Sift | PolyPhen | PhyloP | ECS    | g-st | e-st | e-bs | cosmic |
|-----|-----------|--------|----------|--------|------------|--------|------------|--------|------|----------|--------|--------|------|------|------|--------|
| 10  | 8106046   | GATA3  | nonsyn   | T      | G          | L      | R          | 290    | 0    | 0.98     | 0.9979 | 0.0018 | no   | no   | yes  | yes    |
| 14  | 100363521 | EML1   | nonsense | C      | G          | Y      | X          | 239    | 0    | 0.74     | 0.9984 | 1.7618 | yes  | yes  | yes  | no     |
| 16  | 81398615  | GAN    | nonsyn   | G      | A          | A      | T          | 425    | 0.01 | 0.74     | 0.9996 | 0.0272 | yes  | yes  | no   | no     |
| 17  | 74276151  | QRICH2 | nonsyn   | G      | A          | P      | S          | 1405   | 0.01 | 1        | 0.9996 | 5.6252 | no   | no   | yes  | no     |
| 19  | 46094563  | GPR4   | nonsyn   | C      | T          | V      | M          | 188    | 0.02 | 0.01     | 0.9979 | 0.0055 | yes  | no   | no   | no     |
| 20  | 377023    | TRIB3  | nonsyn   | G      | C          | A      | P          | 256    | 0.01 | 0.84     | 0.9997 | 0.8909 | no   | no   | yes  | no     |

Table S2 E: SNV table patient 1 (damaging or conserved, additional SNVs to Suppl. Table 2C)

| chr | pos       | gene    | effect | ref nt | observ. nt | ref aa | observ. aa | pos aa | Sift | PolyPhen | PhyloP | ECS    | g-st | e-st | e-bs | cosmic |
|-----|-----------|---------|--------|--------|------------|--------|------------|--------|------|----------|--------|--------|------|------|------|--------|
| 1   | 42047914  | HIVEP3  | nonsyn | T      | G          | N      | T          | 852    | 0    | 0.99     | 0.9976 | 3.1492 | no   | no   | yes  | no     |
| 1   | 75805297  | SLC44A5 | nonsyn | T      | C          | D      | G          | 24     | 0    | 1        | 0.9983 | 0.0532 | no   | no   | yes  | no     |
| 1   | 113246418 | RHOC    | nonsyn | C      | T          | A      | T          | 2      | 0.03 | 0        | 0.9984 | 0.0243 | no   | no   | yes  | no     |
| 1   | 153615804 | CHTOP   | nonsyn | C      | T          | R      | C          | 170    | 0    | 0.85     | 0.9993 | 0.07   | yes  | no   | no   | no     |
| 1   | 156146493 | SEMA4A  | nonsyn | C      | A          | P      | Q          | 532    | 0.04 | 0.64     | 0.9979 | 0.2635 | no   | no   | yes  | no     |
| 1   | 183087260 | LAMC1   | nonsyn | C      | T          | R      | C          | 657    | 0    | 1        | 0.9979 | 1.3632 | yes  | yes  | yes  | no     |
| 1   | 222832120 | MIA3    | nonsyn | C      | T          | A      | V          | 1555   | 0.13 | 0.98     | 0.9991 | 1.5735 | no   | yes  | yes  | no     |
| 2   | 21233882  | APOB    | nonsyn | T      | C          | H      | R          | 1953   | 0.88 | 0.82     | 0.2371 | 2.6255 | yes  | no   | yes  | no     |
| 2   | 71654216  | ZNF638  | nonsyn | A      | G          | I      | M          | 1739   | 0    | 0.82     | 0.9145 | 1.2099 | yes  | no   | no   | no     |
| 2   | 103068269 | IL18RAP | nonsyn | A      | C          | R      | S          | 476    | 0    | 1        | 0.9392 | 0.0611 | yes  | yes  | no   | no     |



|    |           |                 |        |   |   |   |   |      |      |      |        |        |     |     |     |     |
|----|-----------|-----------------|--------|---|---|---|---|------|------|------|--------|--------|-----|-----|-----|-----|
| 2  | 170088278 | <i>LRP2</i>     | nonsyn | A | G | C | R | 1725 | 0    | 0.88 | 0.9986 | 1.3948 | no  | no  | yes | no  |
| 2  | 208994242 | <i>CRYGC</i>    | nonsyn | G | A | R | W | 59   | 0.1  | 1    | 0.9392 | 0.2053 | yes | yes | yes | no  |
| 2  | 238275374 | <i>COL6A3</i>   | nonsyn | G | A | A | V | 1212 |      | 0.57 | 0.9994 | 2.0665 | yes | no  | no  | no  |
| 3  | 9780797   | <i>BRPF1</i>    | nonsyn | T | G | S | R | 238  | 0.02 | 0.02 | 0.792  | 0.0143 | yes | no  | no  | no  |
| 3  | 47098793  | <i>SETD2</i>    | nonsyn | G | A | H | Y | 2161 | 0    | 1    | 0.9957 | 0.871  | no  | yes | yes | yes |
| 3  | 111697936 | <i>ABHD10</i>   | nonsyn | G | A | A | T | 10   | 0.06 | 0.46 | 0.9877 | 0.3632 | yes | no  | yes | no  |
| 3  | 119451232 | <i>C3orf15</i>  | nonsyn | G | T | Q | H | 370  | 0    | 0.99 | 0.9684 | 1.6671 | no  | no  | yes | no  |
| 3  | 127335771 | <i>MCM2</i>     | nonsyn | C | T | A | V | 528  | 0    | 1    | 0.9989 | 0.2061 | yes | no  | no  | no  |
| 3  | 183210369 | <i>KLHL6</i>    | nonsyn | T | C | T | A | 493  | 0.04 | 0.02 | 0.8691 | 0.0498 | yes | no  | yes | no  |
| 4  | 81124574  | <i>PRDM8</i>    | nonsyn | C | T | A | V | 653  | 0.02 | 0.13 | 0.9983 | 0.9291 | yes | no  | no  | no  |
| 4  | 129809878 | <i>SCLT1</i>    | nonsyn | G | A | R | C | 654  | 0    | 1    | 0.9995 | 2.3453 | yes | no  | no  | no  |
| 5  | 1798796   | <i>MRPL36</i>   | nonsyn | C | T | R | Q | 85   | 0.17 | 0.95 | 0.9467 | 0.2744 | no  | no  | yes | no  |
| 5  | 71739960  | <i>ZNF366</i>   | nonsyn | C | T | E | K | 620  | 0.06 | 0.78 | 0.9994 | 0.6001 | no  | no  | yes | no  |
| 5  | 140166393 | <i>PCDHA1</i>   | nonsyn | G | T | S | I | 173  | 0.01 | 0.55 | 0.8597 | 2.0306 | no  | yes | yes | no  |
| 5  | 140167635 | <i>PCDHA1</i>   | nonsyn | C | T | A | V | 587  | 0.12 | 0.5  | 0.882  | 2.0306 | yes | no  | no  | no  |
| 6  | 26091725  | <i>HFE</i>      | nonsyn | G | A | R | Q | 87   | 0.08 | 1    | 0.7991 | 0.604  | no  | no  | yes | no  |
| 6  | 109774937 | <i>MICAL1</i>   | nonsyn | C | T | V | M | 124  | 0    | 0.25 | 0.999  | 2.9512 | yes | no  | no  | no  |
| 7  | 5545126   | <i>FBXL18</i>   | nonsyn | C | T | V | I | 52   | 0    | 0.73 | 0.9975 | 0.0464 | yes | no  | no  | no  |
| 7  | 103029485 | <i>SLC26A5</i>  | nonsyn | G | T | A | D | 463  | 0    | 0.99 | 0.9995 | 0.0526 | yes | no  | no  | no  |
| 7  | 148288147 | <i>C7orf33</i>  | nonsyn | G | A | A | T | 44   | 0    | 0.01 | 0.9597 | 0.6387 | no  | no  | yes | no  |
| 7  | 150647363 | <i>KCNH2</i>    | nonsyn | G | A | P | L | 424  | 0    | 0.95 | 0.9987 | 0.3248 | yes | yes | yes | no  |
| 7  | 151962282 | <i>MLL3</i>     | nonsyn | G | A | A | V | 342  | 0.29 | 0.96 | 0.9989 | 0.2818 | no  | no  | yes | no  |
| 8  | 10583282  | <i>SOX7</i>     | nonsyn | G | A | T | M | 378  | 0    | 1    | 0.9994 | 0.1973 | yes | no  | no  | no  |
| 8  | 68044263  | <i>CSPP1</i>    | nonsyn | C | T | P | L | 587  | 0.02 | 0.42 | 0.8906 | 0.4499 | yes | no  | no  | no  |
| 9  | 32635480  | <i>TAF1L</i>    | nonsyn | C | T | G | D | 33   |      | 0.84 | 0.9092 | 0.2873 | yes | no  | no  | no  |
| 9  | 96846997  | <i>PTPDC1</i>   | nonsyn | C | T | A | V | 62   | 0    | 0.89 | 0.9992 | 0.1736 | no  | no  | yes | no  |
| 10 | 120810812 | <i>EIF3A</i>    | nonsyn | G | A | R | C | 740  | 0    | 0.73 | 0.9994 | 0.2848 | yes | no  | no  | no  |
| 10 | 123971211 | <i>TACC2</i>    | nonsyn | C | T | T | M | 502  | 0    | 1    | 0.998  | 2.9859 | yes | yes | yes | no  |
| 10 | 128192969 | <i>C10orf90</i> | nonsyn | A | G | V | A | 267  | 0.01 | 0.02 | 0.9365 | 2.6803 | yes | no  | no  | no  |

|    |           |                 |        |   |   |   |   |      |      |      |        |        |     |     |     |     |
|----|-----------|-----------------|--------|---|---|---|---|------|------|------|--------|--------|-----|-----|-----|-----|
| 11 | 8122493   | <i>TUB</i>      | nonsyn | C | T | R | C | 446  | 0    | 1    | 0.999  | 0.0723 | no  | no  | yes | no  |
| 11 | 9530327   | <i>ZNF143</i>   | nonsyn | C | T | R | W | 437  | 0    | 1    | 0.922  | 2.14   | yes | no  | yes | no  |
| 12 | 430249    | <i>KDM5A</i>    | nonsyn | C | T | R | Q | 818  | 0.78 | 0.77 | 0.9992 | 0.5499 | yes | no  | no  | yes |
| 12 | 10783802  | <i>STYK1</i>    | nonsyn | G | T | A | D | 98   | 0.02 | 0    | 0.9047 | 1.7457 | yes | no  | no  | no  |
| 12 | 56221845  | <i>DNAJC14</i>  | nonsyn | G | A | R | C | 200  | 0    | 1    | 0.9877 | 0.0371 | no  | yes | yes | no  |
| 12 | 91371921  | <i>EPYC</i>     | nonsyn | C | T | G | D | 95   | 0.12 | 0.84 | 0.9991 | 0.478  | yes | no  | yes | no  |
| 13 | 24864923  | <i>SPATA13</i>  | nonsyn | A | G | D | G | 369  | 0    | 0.78 | 0.9983 | 0.3041 | yes | no  | no  | no  |
| 13 | 52667265  | <i>NEK5</i>     | nonsyn | T | C | H | R | 378  | 0.22 | 0.98 | 0.7847 | 0.6349 | yes | no  | no  | no  |
| 13 | 98668017  | <i>IPO5</i>     | nonsyn | A | C | E | D | 843  | 0.02 | 0.99 | 0.9857 | 0.0206 | yes | no  | no  | no  |
| 13 | 101881755 | <i>NALCN</i>    | nonsyn | T | C | T | A | 539  | 0.01 | 0.97 | 0.9975 | 0.0414 | yes | yes | yes | no  |
| 13 | 102568880 | <i>FGF14</i>    | nonsyn | A | C | L | R | 39   | 0.01 | 0.56 | 0.9983 | 0.0501 | no  | no  | yes | no  |
| 15 | 25584307  | <i>UBE3A</i>    | nonsyn | C | T | A | T | 846  | 0.01 | 0.62 | 0.9982 | 0.0128 | yes | yes | no  | no  |
| 15 | 28391389  | <i>HERC2</i>    | nonsyn | G | A | R | W | 3668 | 0    | 1    | 0.9995 | 0.1469 | yes | no  | no  | no  |
| 15 | 41860451  | <i>TYRO3</i>    | nonsyn | G | A | R | H | 333  | 0.1  | 0.88 | 0.0693 | 0.7283 | yes | yes | yes | no  |
| 15 | 42002919  | <i>MGA</i>      | nonsyn | G | A | R | H | 819  | 0    |      |        | 0.873  | yes | no  | no  | no  |
| 15 | 62273608  | <i>VPS13C</i>   | nonsyn | A | G | V | A | 657  | 0    | 0.02 | 0.9991 | 1.101  | yes | no  | no  | no  |
| 15 | 80743328  | <i>ARNT2</i>    | nonsyn | C | T | R | C | 47   | 0    | 0.99 | 0.9976 | 0.2047 | yes | yes | yes | no  |
| 16 | 15811127  | <i>MYH11</i>    | nonsyn | G | A | R | W | 1792 | 0    | 1    | 0.9956 | 0.5946 | yes | no  | no  | yes |
| 16 | 27268842  | <i>NSMCE1</i>   | nonsyn | C | T | R | H | 17   | 0.05 | 0.72 | 0.9984 | 3.5112 | no  | yes | yes | no  |
| 16 | 50744711  | <i>NOD2</i>     | nonsyn | G | C | V | L | 297  | 0.14 | 0.17 | 0.9996 | 0.75   | no  | no  | yes | no  |
| 16 | 67264651  | <i>FHOD1</i>    | nonsyn | C | T | R | H | 904  | 0.02 | 0.75 | 0.8367 | 0.2477 | yes | no  | no  | no  |
| 16 | 80667028  | <i>CDYL2</i>    | nonsyn | C | T | R | H | 241  | 0    | 1    | 0.9983 | 0.0578 | no  | no  | yes | no  |
| 17 | 47656505  | <i>NXPH3</i>    | nonsyn | G | A | R | Q | 201  | 1    | 0.02 | 0.9992 | 0.004  | no  | no  | yes | no  |
| 17 | 48601125  | <i>MYCBPAP</i>  | nonsyn | G | A | D | N | 582  | 0.06 | 0.49 | 0.9929 | 6.6175 | no  | no  | yes | no  |
| 17 | 61882450  | <i>DDX42</i>    | nonsyn | A | G | E | G | 214  | 0.02 | 0.83 | 0.9993 | 0.1547 | no  | no  | yes | no  |
| 18 | 48452143  | <i>ME2</i>      | nonsyn | C | T | R | C | 397  | 0    | 0.95 | 0.9381 | 0.4046 | no  | no  | yes | no  |
| 19 | 15164741  | <i>CASP14</i>   | nonsyn | G | T | K | N | 125  | 0    | 1    | 0.1449 | 0.0447 | no  | no  | yes | no  |
| 19 | 18375992  | <i>KIAA1683</i> | nonsyn | C | A | Q | H | 786  | 0    | 1    | 0.0734 | 9.8172 | yes | no  | no  | no  |
| 19 | 40362730  | <i>FCGBP</i>    | nonsyn | C | A | D | Y | 5114 | 0.01 | 0.97 | 0.9985 | 2.9936 | yes | no  | no  | no  |

|    |           |                |        |   |   |   |   |      |      |      |        |        |     |     |     |    |
|----|-----------|----------------|--------|---|---|---|---|------|------|------|--------|--------|-----|-----|-----|----|
| 19 | 40408082  | <i>FCGBP</i>   | nonsyn | G | T | L | M | 1547 |      | 0.91 | 0.8254 | 2.9936 | no  | no  | yes | no |
| 19 | 47207446  | <i>PRKD2</i>   | nonsyn | C | T | R | Q | 133  | 0    | 1    | 0.9987 | 1.8043 | yes | no  | no  | no |
| 19 | 49713590  | <i>TRPM4</i>   | nonsyn | C | T | R | C | 941  | 0.02 | 1    | 0.9989 | 0.1508 | yes | yes | yes | no |
| 19 | 57176223  | <i>ZNF835</i>  | nonsyn | C | T | C | Y | 115  | 0    |      |        | 3.6035 | yes | no  | no  | no |
| 20 | 76969     | <i>DEFB125</i> | nonsyn | A | G | T | A | 128  | 0.04 | 0.14 | 0.0011 | 0.1743 | yes | no  | no  | no |
| 20 | 33575653  | <i>MYH7B</i>   | nonsyn | A | T | D | V | 493  | 0    | 0.72 | 0.9967 | 1.7309 | no  | yes | yes | no |
| 20 | 42159033  | <i>L3MBTL1</i> | nonsyn | C | T | T | M | 299  | 0    | 1    | 0.999  | 0.1449 | yes | no  | no  | no |
| 21 | 15746149  | <i>HSPA13</i>  | nonsyn | A | T | V | E | 402  | 0    | 0.93 | 0.9989 | 0.0183 | no  | no  | yes | no |
| 21 | 35468198  | <i>SLC5A3</i>  | nonsyn | C | A | S | Y | 234  | 0.01 | 0    | 0.999  | 1.0678 | no  | no  | yes | no |
| 21 | 43708011  | <i>ABCG1</i>   | nonsyn | C | T | A | V | 329  | 0.03 | 0.14 | 0.9968 | 0.0142 | yes | yes | yes | no |
| 22 | 32853263  | <i>BPIFC</i>   | nonsyn | C | A | R | S | 37   | 0.01 | 0.98 | 0.2285 | 4.5579 | no  | no  | yes | no |
| 22 | 35943079  | <i>RASD2</i>   | nonsyn | T | G | S | A | 75   | 0    | 1    | 0.9972 | 0.017  | yes | no  | no  | no |
| 22 | 50987896  | <i>KLHDC7B</i> | nonsyn | T | G | L | R | 434  | 0    | 1    | 0.9965 | 3.3646 | no  | yes | yes | no |
| X  | 47918103  | <i>ZNF630</i>  | nonsyn | A | C | C | W | 576  | 0    | 1    | 0.9819 | 0.2213 | no  | no  | yes | no |
| X  | 84329375  | <i>APOOL</i>   | nonsyn | G | T | K | N | 232  | 0.31 |      |        | 0.0087 | yes | no  | no  | no |
| X  | 99661761  | <i>PCDH19</i>  | nonsyn | C | T | R | H | 612  | 0.02 | 0.99 | 0.9989 | 0.0276 | no  | yes | yes | no |
| X  | 138880854 | <i>ATP11C</i>  | nonsyn | A | C | N | K | 256  | 0    | 1    | 0.9987 | 1.0978 | no  | no  | yes | no |
| X  | 151908787 | <i>CSAG1</i>   | nonsyn | C | A | P | H | 9    | 0    | 0.79 | 0.8333 | 6.6042 | yes | no  | no  | no |
| X  | 151935493 | <i>MAGEA3</i>  | nonsyn | A | C | L | R | 225  | 0    | 1    | 0.9731 | 0.6124 | yes | no  | no  | no |

Table S2 F: SNV table patient 2 (damaging or conserved, additional SNVs to Suppl. Table 2D)

| chr | pos      | gene            | effect | ref nt | observ. nt | ref aa | observ. aa | pos aa | Sift | PolyPhen | PhyloP | ECS     | g-st | e-st | e-bs | cosmic |
|-----|----------|-----------------|--------|--------|------------|--------|------------|--------|------|----------|--------|---------|------|------|------|--------|
| 1   | 16343573 | <i>HSPB7</i>    | nonsyn | T      | C          | E      | G          | 110    | 0.00 | 0.64     | 0.9968 | 0.0272  | no   | no   | yes  | no     |
| 1   | 21926027 | <i>RAP1GAP</i>  | nonsyn | A      | G          | V      | A          | 643    | 1.00 | 0.47     | 0.9957 | 11.463  | no   | no   | yes  | no     |
| 1   | 22047604 | <i>USP48</i>    | nonsyn | G      | T          | L      | I          | 607    | 0.05 | 0.00     | 0.9996 | 0.0346  | yes  | no   | no   | no     |
| 1   | 22329501 | <i>CELA3A</i>   | nonsyn | G      | T          | G      | C          | 17     | 0.00 | 0.72     | 0.9975 | 106.867 | no   | no   | yes  | no     |
| 1   | 57185921 | <i>C1orf168</i> | nonsyn | T      | G          | S      | R          | 686    | 0.07 | 0.56     | 0.9687 | 0.4269  | no   | yes  | yes  | no     |

|    |           |                 |        |   |   |   |   |      |      |      |        |         |     |     |     |     |
|----|-----------|-----------------|--------|---|---|---|---|------|------|------|--------|---------|-----|-----|-----|-----|
| 1  | 91859934  | <i>HFM1</i>     | nonsyn | T | G | L | F | 70   | 0.00 | 0.16 | 0.9389 | 19.611  | no  | no  | yes | no  |
| 1  | 109801069 | <i>CELSR2</i>   | nonsyn | T | C | V | A | 1109 | 0.61 | 0.45 | 0.9964 | 0.7822  | no  | no  | yes | no  |
| 1  | 158151974 | <i>CD1D</i>     | nonsyn | T | G | L | V | 161  | 0.29 | 0.00 | 0.0001 | 0.0579  | no  | no  | yes | no  |
| 1  | 175048706 | <i>TNN</i>      | nonsyn | T | C | V | A | 216  | 0.33 | 0.55 | 0.8329 | 46.155  | no  | no  | yes | no  |
| 1  | 196367787 | <i>KCNT2</i>    | nonsyn | A | C | I | M | 400  | 0.00 | 0.68 | 0.9767 | 0.0143  | no  | no  | yes | no  |
| 1  | 196887442 | <i>CFHR4</i>    | nonsyn | T | A | F | Y | 301  | 0.00 | 0.39 | 0.9871 | 56.184  | no  | no  | yes | no  |
| 2  | 14774302  | <i>FAM84A</i>   | nonsyn | A | C | S | R | 67   | 0.05 | 0.00 | 0.9982 | 0.0000  | no  | no  | yes | no  |
| 2  | 86333449  | <i>PTCD3</i>    | nonsyn | T | A | L | M | 27   | 0.00 | 0.00 | 0.0070 | 0.1793  | no  | no  | yes | no  |
| 2  | 107041568 | <i>RGPD3</i>    | nonsyn | A | C | I | S | 952  | 0.02 |      |        | 13.425  | no  | no  | yes | no  |
| 2  | 116599859 | <i>DPP10</i>    | nonsyn | T | G | F | V | 770  | 0.00 | 0.97 | 0.9985 | 19.456  | no  | no  | yes | no  |
| 2  | 196891498 | <i>DNAH7</i>    | nonsyn | A | G | V | A | 218  | 0.01 | 0.81 | 0.9991 | 19.891  | no  | yes | no  | no  |
| 2  | 215813869 | <i>ABCA12</i>   | nonsyn | A | C | F | C | 1968 | 0.00 | 1.00 | 0.9764 | 11.316  | no  | no  | yes | no  |
| 2  | 225661686 | <i>DOCK10</i>   | nonsyn | A | C | L | V | 1608 | 0.00 |      |        | 0.5502  | no  | no  | yes | no  |
| 3  | 48685833  | <i>CELSR3</i>   | nonsyn | A | C | L | R | 2280 | 0.00 | 0.79 | 0.9964 | 0.4052  | no  | no  | yes | no  |
| 4  | 876583    | <i>GAK</i>      | nonsyn | G | A | R | W | 477  | 0.00 | 1.00 | 0.0843 | 0.5924  | no  | no  | yes | no  |
| 4  | 13571747  | <i>BOD1L</i>    | nonsyn | T | G | K | T | 3015 | 0.00 | 0.99 | 0.9968 | 13.509  | no  | no  | yes | no  |
| 5  | 141694306 | <i>SPRY4</i>    | nonsyn | T | A | Q | L | 123  | 0.64 | 0.95 | 0.9982 | 0.0349  | no  | no  | yes | no  |
| 6  | 33137191  | <i>COL11A2</i>  | nonsyn | G | C | P | R | 1149 | 0.04 | 0.75 | 0.9989 | 0.7828  | no  | no  | yes | no  |
| 6  | 117687277 | <i>ROS1</i>     | nonsyn | T | C | Q | R | 925  | 0.21 | 0.92 | 0.8620 | 15.183  | no  | no  | yes | yes |
| 7  | 106938626 | <i>COG5</i>     | nonsyn | T | G | D | A | 456  | 0.01 | 0.83 | 0.8933 | 0.9487  | yes | no  | no  | no  |
| 7  | 141536919 | <i>PRSS37</i>   | nonsyn | A | C | I | S | 187  | 0.86 | 0.99 | 0.9993 | 41.145  | no  | no  | yes | no  |
| 8  | 65509363  | <i>CYP7B1</i>   | nonsyn | A | C | F | V | 453  | 0.06 | 0.47 | 0.9767 | 0.3939  | no  | no  | yes | no  |
| 9  | 125512506 | <i>OR1L6</i>    | nonsyn | T | C | I | T | 127  | 0.00 | 0.98 | 0.9969 | 380.865 | no  | no  | yes | no  |
| 10 | 1263020   | <i>ADARB2</i>   | nonsyn | T | C | H | R | 518  | 0.02 | 1.00 | 0.9970 | 0.7311  | no  | no  | yes | no  |
| 10 | 118645926 | <i>KIAA1598</i> | nonsyn | C | A | G | C | 609  | 0.02 |      |        | 0.0199  | no  | no  | yes | yes |
| 10 | 135347299 | <i>CYP2E1</i>   | nonsyn | A | G | I | V | 289  | 0.03 | 0.00 | 0.0142 | 0.6131  | yes | no  | no  | no  |
| 11 | 64663944  | <i>ATG2A</i>    | nonsyn | T | C | Q | R | 1806 | 0.10 | 0.99 | 0.9942 | 15.500  | no  | no  | yes | no  |
| 11 | 118518752 | <i>PHLDB1</i>   | nonsyn | T | C | V | A | 1158 | 0.00 | 0.57 | 0.9976 | 0.2071  | no  | no  | yes | no  |
| 11 | 118986890 | <i>C2CD2L</i>   | nonsyn | T | A | F | Y | 683  | 0.03 | 0.99 | 0.9980 | 0.2956  | no  | no  | yes | no  |

|    |          |                 |          |   |   |   |   |      |      |      |        |         |     |     |     |     |
|----|----------|-----------------|----------|---|---|---|---|------|------|------|--------|---------|-----|-----|-----|-----|
| 12 | 40012871 | <i>ABCD2</i>    | nonsyn   | C | T | A | T | 183  | 0.01 | 0.74 | 0.9980 | 0.0799  | yes | no  | no  | no  |
| 14 | 25043464 | <i>CTSG</i>     | nonsyn   | T | G | K | T | 194  | 0.00 | 0.98 | 0.9676 | 15.316  | no  | yes | yes | no  |
| 14 | 37132597 | <i>PAX9</i>     | nonsyn   | C | T | T | M | 167  | 0.02 | 0.46 | 0.9984 | 11.336  | yes | no  | no  | no  |
| 16 | 150473   | <i>NPRL3</i>    | nonsyn   | T | C | S | G | 43   | 0.00 |      |        | 0.1839  | no  | no  | yes | no  |
| 16 | 31090892 | <i>ZNF646</i>   | nonsyn   | G | A | V | I | 1083 | 0.35 | 0.05 | 0.9997 | 18.997  | no  | no  | yes | no  |
| 16 | 67709818 | <i>GFOD2</i>    | nonsyn   | A | G | M | T | 133  | 0.05 | 0.82 | 0.9981 | 0.0107  | no  | yes | yes | no  |
| 16 | 68023265 | <i>DPEP2</i>    | nonsyn   | T | G | K | T | 344  | 0.03 | 0.00 | 0.9742 | 44.821  | no  | yes | yes | no  |
| 16 | 84224888 | <i>ADAD2</i>    | nonsyn   | C | G | R | G | 18   | 0.00 | 0.99 | 0.9674 | 42.752  | no  | no  | yes | no  |
| 16 | 88713569 | <i>CYBA</i>     | nonsyn   | A | T | F | Y | 48   | 0.04 | 0.87 | 0.9957 | 162.433 | no  | no  | yes | no  |
| 17 | 14205307 | <i>HS3ST3B1</i> | nonsyn   | C | T | R | C | 158  | 0.00 | 0.74 | 0.9978 | 0.2017  | yes | no  | no  | no  |
| 17 | 36499576 | <i>GPR179</i>   | nonsyn   | G | A | R | C | 33   | 0.00 | 1.00 | 0.9909 | 0.6524  | no  | no  | yes | no  |
| 17 | 36895869 | <i>PCGF2</i>    | nonsyn   | A | G | V | A | 60   | 0.00 | 0.99 | 0.9652 | 0.0237  | no  | no  | yes | no  |
| 17 | 37374365 | <i>STAC2</i>    | nonsyn   | T | C | N | S | 51   | 0.00 | 0.99 | 0.9977 | 0.0257  | no  | yes | yes | no  |
| 17 | 38508279 | <i>RARA</i>     | nonsyn   | A | C | Q | P | 99   | 0.00 | 0.37 | 0.9966 | 0.0206  | no  | no  | yes | yes |
| 17 | 48277129 | <i>COL1A1</i>   | nonsyn   | A | G | C | R | 95   | 0.00 | 0.79 | 0.9983 | 10.697  | no  | no  | yes | yes |
| 18 | 3879864  | <i>DLGAP1</i>   | stoploss | T | C | X | G | 69   |      | 0.98 | 0.9981 | 0.6117  | no  | no  | yes | no  |
| 18 | 9887707  | <i>TXNDC2</i>   | nonsyn   | A | G | T | A | 411  |      | 0.79 | 0.2339 | 79.892  | no  | no  | yes | no  |
| 19 | 9578567  | <i>ZNF560</i>   | nonsyn   | T | A | E | D | 352  | 0.13 | 0.87 | 0.7827 | 0.2806  | no  | no  | yes | no  |
| 19 | 11568960 | <i>ELAVL3</i>   | nonsyn   | G | A | T | M | 210  | 0.37 | 0.00 | 0.9836 | 0.0012  | no  | no  | yes | no  |
| 19 | 36342206 | <i>NPHS1</i>    | nonsyn   | C | A | G | W | 119  | 0.00 | 0.94 | 0.9432 | 12.396  | no  | no  | yes | no  |
| 19 | 39871319 | <i>SAMD4B</i>   | nonsyn   | G | C | R | P | 581  | 0.00 | 1.00 | 0.9992 | 0.0188  | no  | no  | yes | no  |
| 19 | 55241094 | <i>KIR3DL3</i>  | nonsyn   | T | C | L | P | 264  | 0.02 | 0.31 | 0.0186 | 16.339  | no  | no  | yes | no  |
| 22 | 40800438 | <i>SGSM3</i>    | nonsyn   | C | G | I | M | 115  | 0.00 | 0.09 | 0.8535 | 0.1747  | no  | no  | yes | no  |
| X  | 12736568 | <i>FRMPD4</i>   | nonsyn   | T | C | F | S | 1208 | 0.00 | 0.07 | 0.9979 | 0.0212  | no  | no  | yes | no  |

Table S3 A: Small InDels patient 1

| chr | start     | end       | gene            | type                   | ref nt | observed nt | ref aa | aa pos | called in exome? | called in genome? | cosmic |
|-----|-----------|-----------|-----------------|------------------------|--------|-------------|--------|--------|------------------|-------------------|--------|
| 1   | 1560788   | 1560788   | <i>MIB2</i>     | frameshift insertion   | -      | G           | W      | 332    | uncovered        | yes               | no     |
| 1   | 10725600  | 10725600  | <i>CASZ1</i>    | frameshift insertion   | -      | G           | P      | 15     | uncovered        | yes               | no     |
| 1   | 27088787  | 27088787  | <i>ARID1A</i>   | frameshift insertion   | -      | G           | Q      | 799    | no               | yes               | yes    |
| 1   | 39833833  | 39833833  | <i>MACF1</i>    | frameshift deletion    | A      | -           | E      | 2702   | no               | yes               | no     |
| 1   | 40366751  | 40366751  | <i>MYCL1</i>    | frameshift insertion   | -      | G           | R      | 119    | uncovered        | yes               | no     |
| 1   | 47904569  | 47904569  | <i>FOXD2</i>    | frameshift insertion   | -      | G           | G      | 254    | uncovered        | yes               | no     |
| 1   | 50884762  | 50884762  | <i>DMRTA2</i>   | frameshift insertion   | -      | C           | L      | 402    | uncovered        | yes               | no     |
| 1   | 59156071  | 59156071  | <i>MYSM1</i>    | frameshift deletion    | T      | -           | K      | 79     | yes              | yes               | no     |
| 1   | 92643415  | 92643415  | <i>KIAA1107</i> | frameshift deletion    | A      | -           | K      | 363    | uncovered        | yes               | no     |
| 1   | 156255317 | 156255317 | <i>TMEM79</i>   | frameshift insertion   | -      | C           | E      | 100    | yes              | yes               | no     |
| 1   | 214814551 | 214814554 | <i>CENPF</i>    | frameshift deletion    | AAAT   | -           |        | 957    | yes              | yes               | no     |
| 1   | 225528370 | 225528370 | <i>DNAH14</i>   | frameshift insertion   | -      | A           | E      | 3456   | uncovered        | yes               | no     |
| 1   | 235345419 | 235345419 | <i>ARID4B</i>   | frameshift deletion    | T      | -           | T      | 853    | yes              | yes               | no     |
| 1   | 249141827 | 249141827 | <i>ZNF672</i>   | frameshift insertion   | -      | C           | R      | 118    | uncovered        | yes               | no     |
| 2   | 17698737  | 17698737  | <i>RAD51AP2</i> | frameshift deletion    | T      | -           | T      | 316    | no               | yes               | no     |
| 2   | 24300578  | 24300580  | <i>TP53I3</i>   | nonframeshift deletion | GGA    | -           |        | 224    | yes              | yes               | no     |
| 2   | 73520690  | 73520690  | <i>EGR4</i>     | frameshift deletion    | C      | -           | G      | 22     | uncovered        | yes               | no     |
| 2   | 97824365  | 97824365  | <i>ANKRD36</i>  | frameshift insertion   | -      | T           | N      | 454    | uncovered        | yes               | no     |
| 2   | 109421454 | 109421454 | <i>CCDC138</i>  | frameshift insertion   | -      | A           | L      | 282    | no               | yes               | no     |
| 2   | 152320541 | 152320541 | <i>RIF1</i>     | frameshift deletion    | A      | -           | K      | 1503   | yes              | yes               | no     |
| 2   | 166011130 | 166011130 | <i>SCN3A</i>    | frameshift deletion    | A      | -           | F      | 404    | yes              | yes               | no     |
| 2   | 178257585 | 178257585 | <i>AGPS</i>     | frameshift insertion   | -      | G           | A      | 23     | uncovered        | yes               | no     |
| 2   | 186662103 | 186662103 | <i>FSIP2</i>    | frameshift deletion    | A      | -           | K      | 3503   | uncovered        | yes               | no     |
| 2   | 217559252 | 217559252 | <i>IGFBP5</i>   | frameshift deletion    | G      | -           | R      | 83     | uncovered        | yes               | no     |
| 2   | 219757717 | 219757717 | <i>WNT10A</i>   | frameshift insertion   | -      | C           | G      | 326    | uncovered        | yes               | no     |
| 2   | 231738163 | 231738163 | <i>ITM2C</i>    | frameshift deletion    | G      | -           | R      | 51     | no               | yes               | no     |

|   |           |           |                   |                      |    |   |   |       |           |     |    |
|---|-----------|-----------|-------------------|----------------------|----|---|---|-------|-----------|-----|----|
| 2 | 242626190 | 242626190 | <i>DTYMK</i>      | frameshift insertion | -  | C | A | 3     | uncovered | yes | no |
| 3 | 45267441  | 45267441  | <i>TMEM158</i>    | frameshift insertion | -  | G | G | 27    | uncovered | yes | no |
| 3 | 50647874  | 50647875  | <i>CISH</i>       | frameshift deletion  | TG | - |   | 13324 | uncovered | yes | no |
| 3 | 126194513 | 126194513 | <i>ZXDC</i>       | frameshift insertion | -  | G | A | 66    | uncovered | yes | no |
| 3 | 184039592 | 184039592 | <i>EIF4G1</i>     | frameshift deletion  | C  | - | A | 211   | yes       | yes | no |
| 3 | 194991598 | 194991598 | <i>C3orf21</i>    | frameshift insertion | -  | G | A | 64    | uncovered | yes | no |
| 4 | 15005749  | 15005749  | <i>CPEB2</i>      | frameshift insertion | -  | G | G | 484   | uncovered | yes | no |
| 4 | 25278792  | 25278792  | <i>PI4K2B</i>     | frameshift deletion  | T  | - | F | 477   | yes       | yes | no |
| 4 | 42153875  | 42153875  | <i>BEND4</i>      | frameshift insertion | -  | G | A | 96    | uncovered | yes | no |
| 4 | 71508472  | 71508472  | <i>ENAM</i>       | frameshift deletion  | A  | - | P | 443   | no        | yes | no |
| 4 | 109748336 | 109748336 | <i>COL25A1</i>    | frameshift deletion  | T  | - | K | 573   | no        | yes | no |
| 4 | 142643137 | 142643137 | <i>IL15</i>       | frameshift insertion | -  | A | L | 57    | yes       | yes | no |
| 4 | 164466808 | 164466808 | <i>03.01.2017</i> | frameshift deletion  | A  | - | W | 154   | yes       | yes | no |
| 5 | 60628709  | 60628709  | <i>ZSWIM6</i>     | frameshift insertion | -  | G | R | 204   | uncovered | yes | no |
| 5 | 73981222  | 73981222  | <i>HEXB</i>       | frameshift insertion | -  | G | P | 46    | uncovered | yes | no |
| 5 | 145883505 | 145883506 | <i>TCERG1</i>     | frameshift deletion  | GA | - |   | 868   | yes       | yes | no |
| 5 | 169309816 | 169309816 | <i>FAM196B</i>    | frameshift insertion | -  | G | T | 363   | uncovered | yes | no |
| 5 | 169677853 | 169677853 | <i>LCP2</i>       | frameshift deletion  | T  | - | T | 454   | yes       | yes | no |
| 6 | 22570251  | 22570251  | <i>HDGFL1</i>     | frameshift deletion  | G  | - | A | 149   | uncovered | yes | no |
| 6 | 25491971  | 25491971  | <i>LRRC16A</i>    | frameshift deletion  | T  | - | N | 359   | uncovered | yes | no |
| 6 | 30122095  | 30122096  | <i>TRIM10</i>     | frameshift deletion  | GT | - |   | 366   | yes       | yes | no |
| 6 | 31868562  | 31868562  | <i>ZBTB12</i>     | frameshift deletion  | G  | - | P | 174   | no        | yes | no |
| 6 | 42073643  | 42073643  | <i>C6orf132</i>   | frameshift insertion | -  | G | P | 669   | uncovered | yes | no |
| 6 | 138751899 | 138751899 | <i>NHSL1</i>      | frameshift insertion | -  | G | I | 1199  | uncovered | yes | no |
| 6 | 150263278 | 150263278 | <i>ULBP2</i>      | frameshift insertion | -  | G | R | 24    | uncovered | yes | no |
| 6 | 166721385 | 166721385 | <i>PRR18</i>      | frameshift insertion | -  | C | S | 82    | uncovered | yes | no |
| 7 | 2394615   | 2394615   | <i>EIF3B</i>      | frameshift insertion | -  | C | G | 20    | uncovered | yes | no |
| 7 | 6662529   | 6662529   | <i>ZNF853</i>     | frameshift insertion | -  | G | P | 636   | uncovered | yes | no |
| 7 | 27170236  | 27170236  | <i>HOXA4</i>      | frameshift insertion | -  | C | G | 39    | uncovered | yes | no |

|    |           |           |                     |                        |     |   |   |     |           |     |     |
|----|-----------|-----------|---------------------|------------------------|-----|---|---|-----|-----------|-----|-----|
| 7  | 44268438  | 44268438  | <i>CAMK2B</i>       | frameshift insertion   | -   | G | P | 475 | uncovered | yes | no  |
| 7  | 138916512 | 138916512 | <i>UBN2</i>         | frameshift insertion   | -   | C | E | 94  | uncovered | yes | no  |
| 7  | 140482927 | 140482927 | <i>BRAF</i>         | frameshift deletion    | G   | - | P | 403 | yes       | no  | yes |
| 7  | 141170468 | 141170468 | <i>LOC100507421</i> | frameshift deletion    | G   | - | W | 256 | uncovered | yes | no  |
| 8  | 11566247  | 11566249  | <i>GATA4</i>        | nonframeshift deletion | CCT | - |   | 142 | uncovered | yes | no  |
| 8  | 38645217  | 38645217  | <i>TACC1</i>        | frameshift insertion   | -   | G | P | 39  | uncovered | yes | no  |
| 8  | 54793598  | 54793598  | <i>RGS20</i>        | frameshift insertion   | -   | G | E | 8   | uncovered | yes | no  |
| 8  | 68950480  | 68950480  | <i>PREX2</i>        | frameshift insertion   | -   | T | V | 264 | yes       | no  | yes |
| 8  | 145535689 | 145535689 | <i>HSF1</i>         | frameshift deletion    | C   | - | P | 301 | uncovered | yes | no  |
| 9  | 13217182  | 13217182  | <i>MPDZ</i>         | frameshift insertion   | -   | T | L | 400 | uncovered | yes | no  |
| 9  | 125330322 | 125330324 | <i>OR1L8</i>        | nonframeshift deletion | CAG | - |   | 145 | yes       | yes | no  |
| 9  | 136342177 | 136342177 | <i>SLC2A6</i>       | frameshift insertion   | -   | C | L | 148 | uncovered | yes | no  |
| 9  | 139259595 | 139259595 | <i>CARD9</i>        | frameshift deletion    | G   | - | H | 478 | uncovered | yes | no  |
| 9  | 139564768 | 139564768 | <i>EGFL7</i>        | frameshift deletion    | C   | - | A | 186 | uncovered | yes | no  |
| 10 | 21101841  | 21101841  | <i>NEBL</i>         | frameshift insertion   | -   | T | T | 129 | yes       | no  | no  |
| 10 | 23728536  | 23728536  | <i>OTUD1</i>        | frameshift insertion   | -   | G | T | 50  | uncovered | yes | no  |
| 10 | 88423518  | 88423518  | <i>OPN4</i>         | frameshift deletion    | C   | - | P | 453 | uncovered | yes | no  |
| 10 | 99400629  | 99400629  | <i>PI4K2A</i>       | frameshift insertion   | -   | C | S | 44  | uncovered | yes | no  |
| 10 | 101295273 | 101295273 | <i>NKX2-3</i>       | frameshift insertion   | -   | G | A | 297 | uncovered | yes | no  |
| 10 | 102746683 | 102746685 | <i>MRPL43</i>       | nonframeshift deletion | CTC | - |   | 96  | uncovered | yes | no  |
| 10 | 102987157 | 102987157 | <i>LBX1</i>         | frameshift deletion    | G   | - | P | 239 | uncovered | yes | no  |
| 10 | 103990420 | 103990420 | <i>PITX3</i>        | frameshift insertion   | -   | G | Y | 254 | uncovered | yes | no  |
| 10 | 104182716 | 104182716 | <i>FBXL15</i>       | frameshift insertion   | -   | G | A | 290 | uncovered | yes | no  |
| 10 | 121411254 | 121411254 | <i>BAG3</i>         | frameshift deletion    | C   | - | P | 23  | uncovered | yes | no  |
| 10 | 127462683 | 127462683 | <i>MMP21</i>        | frameshift deletion    | G   | - | P | 138 | uncovered | yes | no  |
| 11 | 2181203   | 2181203   | <i>INS</i>          | frameshift deletion    | C   | - | G | 71  | uncovered | yes | no  |
| 11 | 33721959  | 33721961  | <i>C11orf91</i>     | nonframeshift deletion | AGA | - |   | 109 | uncovered | yes | no  |
| 11 | 47202199  | 47202199  | <i>PACSIN3</i>      | frameshift deletion    | A   | - | F | 85  | uncovered | yes | no  |
| 11 | 58346929  | 58346929  | <i>ZFP91</i>        | frameshift insertion   | -   | C | A | 59  | uncovered | yes | no  |



|    |           |           |                   |                         |     |      |   |      |           |     |     |
|----|-----------|-----------|-------------------|-------------------------|-----|------|---|------|-----------|-----|-----|
| 11 | 65403681  | 65403681  | <i>PCNXL3</i>     | frameshift insertion    | -   | G    | G | 1832 | uncovered | yes | no  |
| 11 | 66307267  | 66307267  | <i>ZDHC24</i>     | frameshift insertion    | -   | AAGG | L | 196  | uncovered | yes | no  |
| 11 | 67262953  | 67262953  | <i>PITPNM1</i>    | frameshift deletion     | G   | -    | P | 812  | uncovered | yes | no  |
| 11 | 71951160  | 71951160  | <i>PHOX2A</i>     | frameshift insertion    | -   | C    | A | 163  | uncovered | yes | no  |
| 11 | 75379136  | 75379136  | <i>MAP6</i>       | frameshift insertion    | -   | C    | R | 93   | uncovered | yes | no  |
| 11 | 87013374  | 87013374  | <i>TMEM135</i>    | frameshift deletion     | T   | -    | S | 174  | yes       | yes | no  |
| 11 | 92087750  | 92087750  | <i>FAT3</i>       | frameshift insertion    | -   | A    | A | 824  | yes       | yes | no  |
| 11 | 93428779  | 93428779  | <i>KIAA1731</i>   | frameshift deletion     | A   | -    | R | 550  | uncovered | yes | no  |
| 11 | 108256684 | 108256684 | <i>C11orf65</i>   | frameshift insertion    | -   | T    | K | 250  | no        | yes | no  |
| 11 | 122848460 | 122848460 | <i>BSX</i>        | frameshift insertion    | -   | C    | A | 200  | uncovered | yes | no  |
| 12 | 19592890  | 19592890  | <i>AEBP2</i>      | frameshift insertion    | -   | C    | S | 86   | uncovered | yes | no  |
| 12 | 48577960  | 48577960  | <i>C12orf68</i>   | frameshift deletion     | C   | -    | P | 19   | uncovered | yes | no  |
| 12 | 50190327  | 50190327  | <i>NCKAP5L</i>    | frameshift deletion     | G   | -    | P | 439  | uncovered | yes | no  |
| 12 | 54332886  | 54332886  | <i>HOXC13</i>     | frameshift insertion    | -   | C    | A | 66   | uncovered | yes | yes |
| 12 | 56827355  | 56827355  | <i>TIMELESS</i>   | frameshift insertion    | -   | A    | L | 111  | yes       | no  | no  |
| 12 | 58149402  | 58149402  | <i>03.06.2017</i> | nonframeshift insertion | -   | CGG  | R | 31   | uncovered | yes | no  |
| 12 | 62954511  | 62954511  | <i>MON2</i>       | frameshift deletion     | A   | -    | E | 1217 | yes       | yes | no  |
| 12 | 65563984  | 65563984  | <i>LEMD3</i>      | frameshift insertion    | -   | G    | A | 203  | uncovered | yes | no  |
| 12 | 80175596  | 80175596  | <i>PPP1R12A</i>   | frameshift insertion    | -   | T    | R | 898  | uncovered | yes | no  |
| 12 | 106532389 | 106532389 | <i>NUAK1</i>      | frameshift insertion    | -   | G    | L | 15   | uncovered | yes | no  |
| 12 | 110941673 | 110941673 | <i>RAD9B</i>      | frameshift deletion     | A   | -    | K | 37   | no        | yes | no  |
| 13 | 32885712  | 32885712  | <i>ZAR1L</i>      | frameshift deletion     | G   | -    | P | 117  | uncovered | yes | no  |
| 13 | 110435612 | 110435612 | <i>IRS2</i>       | frameshift insertion    | -   | G    | R | 930  | uncovered | yes | no  |
| 13 | 112722529 | 112722529 | <i>SOX1</i>       | frameshift insertion    | -   | C    | G | 186  | uncovered | yes | no  |
| 14 | 61190643  | 61190643  | <i>SIX4</i>       | frameshift insertion    | -   | G    | P | 50   | uncovered | yes | no  |
| 14 | 75230626  | 75230626  | <i>YLPM1</i>      | frameshift deletion     | C   | -    | S | 145  | uncovered | yes | no  |
| 14 | 77744769  | 77744769  | <i>POMT2</i>      | frameshift insertion    | -   | C    | G | 705  | uncovered | yes | no  |
| 14 | 101005508 | 101005508 | <i>BEGAIN</i>     | frameshift insertion    | -   | G    | S | 194  | uncovered | yes | no  |
| 14 | 104638177 | 104638179 | <i>KIF26A</i>     | nonframeshift deletion  | GGT | -    |   | 411  | uncovered | yes | no  |

|    |          |          |                 |                      |     |    |   |      |           |     |     |
|----|----------|----------|-----------------|----------------------|-----|----|---|------|-----------|-----|-----|
| 15 | 34444996 | 34444996 | <i>C15orf29</i> | frameshift deletion  | A   | -  | S | 145  | yes       | yes | no  |
| 15 | 41687234 | 41687234 | <i>NDUFAF1</i>  | frameshift deletion  | A   | -  | F | 194  | yes       | yes | no  |
| 15 | 42174159 | 42174159 | <i>SPTBN5</i>   | frameshift insertion | -   | C  | A | 776  | uncovered | yes | no  |
| 15 | 63414257 | 63414257 | <i>LACTB</i>    | frameshift insertion | -   | C  | A | 63   | uncovered | yes | no  |
| 15 | 68119568 | 68119568 | <i>SKOR1</i>    | frameshift insertion | -   | C  | A | 424  | uncovered | yes | no  |
| 15 | 72612182 | 72612182 | <i>CELF6</i>    | frameshift insertion | -   | G  | A | 12   | uncovered | yes | no  |
| 15 | 73615063 | 73615063 | <i>HCN4</i>     | frameshift deletion  | C   | -  | G | 1124 | uncovered | yes | no  |
| 15 | 73615394 | 73615394 | <i>HCN4</i>     | frameshift deletion  | C   | -  | A | 1014 | uncovered | yes | no  |
| 15 | 74726122 | 74726122 | <i>SEMA7A</i>   | frameshift insertion | -   | C  | G | 46   | uncovered | yes | no  |
| 15 | 75942736 | 75942736 | <i>SNX33</i>    | frameshift deletion  | C   | -  | D | 431  | no        | yes | no  |
| 16 | 1245562  | 1245562  | <i>CACNA1H</i>  | frameshift insertion | -   | G  | A | 181  | uncovered | yes | no  |
| 16 | 1401980  | 1401980  | <i>GNPTG</i>    | frameshift insertion | -   | G  | L | 5    | uncovered | yes | no  |
| 16 | 20810178 | 20810178 | <i>ERI2</i>     | frameshift deletion  | T   | -  | N | 315  | uncovered | yes | no  |
| 16 | 20844363 | 20844363 | <i>LOC81691</i> | frameshift deletion  | T   | -  | L | 434  | yes       | yes | no  |
| 16 | 27506189 | 27506189 | <i>GTF3C1</i>   | frameshift insertion | -   | G  | P | 891  | yes       | no  | no  |
| 16 | 30021389 | 30021389 | <i>DOC2A</i>    | frameshift insertion | -   | CC | A | 52   | uncovered | yes | no  |
| 16 | 50187728 | 50187728 | <i>PAPD5</i>    | frameshift insertion | -   | C  | T | 51   | uncovered | yes | no  |
| 16 | 67695546 | 67695546 | <i>PARD6A</i>   | frameshift insertion | -   | C  | G | 84   | uncovered | yes | no  |
| 16 | 72993830 | 72993830 | <i>ZFHX3</i>    | frameshift insertion | -   | C  | S | 72   | uncovered | yes | yes |
| 16 | 75682105 | 75682105 | <i>TERF2IP</i>  | frameshift insertion | -   | C  | T | 109  | uncovered | yes | no  |
| 16 | 87448918 | 87448918 | <i>ZCCHC14</i>  | frameshift insertion | -   | C  | A | 343  | yes       | yes | no  |
| 16 | 88495435 | 88495435 | <i>ZNF469</i>   | frameshift insertion | -   | G  | G | 519  | uncovered | yes | no  |
| 16 | 89349641 | 89349641 | <i>ANKRD11</i>  | frameshift deletion  | T   | -  | K | 1103 | yes       | yes | no  |
| 16 | 89753118 | 89753120 | <i>CDK10</i>    | frameshift deletion  | CAT | -  |   | 10   | uncovered | yes | no  |
| 17 | 2298441  | 2298441  | <i>MNT</i>      | frameshift deletion  | G   | -  | P | 127  | uncovered | yes | no  |
| 17 | 4693224  | 4693224  | <i>GLTPD2</i>   | frameshift deletion  | C   | -  | A | 170  | uncovered | yes | no  |
| 17 | 10600660 | 10600660 | <i>SCO1</i>     | frameshift insertion | -   | G  | S | 55   | uncovered | yes | no  |
| 17 | 18087645 | 18087645 | <i>ALKBH5</i>   | frameshift insertion | -   | C  | A | 30   | uncovered | yes | no  |
| 17 | 20108263 | 20108263 | <i>SPECC1</i>   | frameshift deletion  | A   | -  | K | 220  | no        | yes | yes |

|    |          |          |                 |                      |    |   |   |      |           |     |    |
|----|----------|----------|-----------------|----------------------|----|---|---|------|-----------|-----|----|
| 17 | 46985900 | 46985900 | <i>UBE2Z</i>    | frameshift insertion | -  | G | A | 12   | uncovered | yes | no |
| 17 | 46986017 | 46986018 | <i>UBE2Z</i>    | frameshift deletion  | CA | - |   | 51   | uncovered | yes | no |
| 17 | 47297238 | 47297238 | <i>ABI3</i>     | frameshift insertion | -  | G | P | 183  | uncovered | yes | no |
| 17 | 48624635 | 48624635 | <i>SPATA20</i>  | frameshift insertion | -  | G | A | 22   | uncovered | yes | no |
| 17 | 76968105 | 76968105 | <i>LGALS3BP</i> | frameshift deletion  | C  | - | G | 437  | yes       | yes | no |
| 17 | 79425361 | 79425361 | <i>BAHCC1</i>   | frameshift insertion | -  | C | A | 1683 | uncovered | yes | no |
| 17 | 79425400 | 79425400 | <i>BAHCC1</i>   | frameshift insertion | -  | C | A | 1696 | uncovered | yes | no |
| 19 | 577814   | 577814   | <i>BSG</i>      | frameshift deletion  | G  | - | V | 36   | uncovered | yes | no |
| 19 | 1465537  | 1465537  | <i>APC2</i>     | frameshift insertion | -  | C | G | 746  | uncovered | yes | no |
| 19 | 2251182  | 2251182  | <i>AMH</i>      | frameshift deletion  | C  | - | V | 303  | uncovered | yes | no |
| 19 | 4175089  | 4175089  | <i>SIRT6</i>    | frameshift insertion | -  | G | L | 198  | uncovered | yes | no |
| 19 | 4543990  | 4543990  | <i>SEMA6B</i>   | frameshift insertion | -  | G | A | 764  | uncovered | yes | no |
| 19 | 10121036 | 10121036 | <i>COL5A3</i>   | frameshift insertion | -  | G | Q | 9    | uncovered | yes | no |
| 19 | 14201203 | 14201203 | <i>SAMD1</i>    | frameshift insertion | -  | G | P | 10   | uncovered | yes | no |
| 19 | 19006845 | 19006845 | <i>CERS1</i>    | frameshift insertion | -  | C | P | 13   | uncovered | yes | no |
| 19 | 19654762 | 19654762 | <i>CILP2</i>    | frameshift deletion  | C  | - | P | 470  | no        | yes | no |
| 19 | 36120066 | 36120066 | <i>RBM42</i>    | frameshift insertion | -  | G | A | 4    | uncovered | yes | no |
| 19 | 36223970 | 36223970 | <i>MLL4</i>     | frameshift insertion | -  | T | V | 2174 | uncovered | yes | no |
| 19 | 36359544 | 36359544 | <i>APLP1</i>    | frameshift insertion | -  | C | G | 2    | uncovered | yes | no |
| 19 | 39226910 | 39226910 | <i>CAPN12</i>   | frameshift insertion | -  | C | L | 475  | uncovered | yes | no |
| 19 | 41699266 | 41699266 | <i>CYP2S1</i>   | frameshift deletion  | C  | - | P | 33   | uncovered | yes | no |
| 19 | 44118005 | 44118006 | <i>SRRM5</i>    | frameshift deletion  | GA | - |   | 578  | uncovered | yes | no |
| 19 | 45899436 | 45899436 | <i>PPP1R13L</i> | frameshift deletion  | C  | - | G | 298  | uncovered | yes | no |
| 19 | 48949367 | 48949367 | <i>GRWD1</i>    | frameshift insertion | -  | G | P | 35   | uncovered | yes | no |
| 19 | 50161631 | 50161631 | <i>SCAF1</i>    | frameshift insertion | -  | G | P | 1305 | uncovered | yes | no |
| 19 | 54659494 | 54659494 | <i>LENG1</i>    | frameshift insertion | -  | C | R | 254  | uncovered | yes | no |
| 19 | 54974667 | 54974667 | <i>LENG9</i>    | frameshift insertion | -  | G | A | 37   | uncovered | yes | no |
| 19 | 55998075 | 55998075 | <i>NAT14</i>    | frameshift insertion | -  | C | V | 125  | uncovered | yes | no |
| 19 | 56011445 | 56011445 | <i>SSC5D</i>    | frameshift deletion  | C  | - | S | 656  | uncovered | yes | no |

|    |           |           |                 |                        |     |    |   |      |           |     |     |
|----|-----------|-----------|-----------------|------------------------|-----|----|---|------|-----------|-----|-----|
| 20 | 278509    | 278509    | <i>ZCCHC3</i>   | frameshift insertion   | -   | G  | R | 94   | uncovered | yes | no  |
| 20 | 5987071   | 5987071   | <i>CRLS1</i>    | frameshift insertion   | -   | G  | L | 60   | uncovered | yes | no  |
| 20 | 21695239  | 21695239  | <i>PAX1</i>     | frameshift insertion   | -   | G  | Q | 468  | uncovered | yes | no  |
| 20 | 35064745  | 35064745  | <i>DLGAP4</i>   | frameshift deletion    | C   | -  | N | 411  | uncovered | yes | no  |
| 20 | 35414897  | 35414897  | <i>KIAA0889</i> | frameshift deletion    | G   | -  | P | 1659 | uncovered | yes | no  |
| 20 | 42143414  | 42143414  | <i>L3MBTL1</i>  | frameshift insertion   | -   | G  | A | 77   | uncovered | yes | no  |
| 20 | 57429638  | 57429640  | <i>GNAS</i>     | nonframeshift deletion | GAT | -  |   | 377  | uncovered | yes | yes |
| 20 | 58514841  | 58514841  | <i>PPP1R3D</i>  | frameshift insertion   | -   | G  | R | 49   | uncovered | yes | no  |
| 20 | 62200526  | 62200528  | <i>PRIC285</i>  | nonframeshift deletion | CCT | -  |   | 354  | uncovered | yes | no  |
| 21 | 34443272  | 34443272  | <i>OLIG1</i>    | frameshift insertion   | -   | G  | G | 240  | uncovered | yes | no  |
| 21 | 46897723  | 46897723  | <i>COL18A1</i>  | frameshift deletion    | C   | -  | G | 535  | uncovered | yes | no  |
| 22 | 17601541  | 17601541  | <i>CECR6</i>    | frameshift insertion   | -   | C  | G | 159  | uncovered | yes | no  |
| 22 | 17601574  | 17601574  | <i>CECR6</i>    | frameshift insertion   | -   | C  | G | 148  | uncovered | yes | no  |
| 22 | 19511720  | 19511720  | <i>CLDN5</i>    | frameshift deletion    | C   | -  | G | 105  | uncovered | yes | no  |
| 22 | 22221701  | 22221701  | <i>MAPK1</i>    | frameshift insertion   | -   | C  | G | 10   | uncovered | yes | yes |
| 22 | 26902289  | 26902289  | <i>TFIP11</i>   | frameshift deletion    | C   | -  | G | 167  | yes       | yes | no  |
| 22 | 40058306  | 40058306  | <i>CACNA1I</i>  | frameshift insertion   | -   | C  | A | 1045 | uncovered | yes | no  |
| 22 | 51133261  | 51133261  | <i>SHANK3</i>   | frameshift insertion   | -   | T  | G | 363  | uncovered | yes | no  |
| X  | 16965034  | 16965034  | <i>REPS2</i>    | frameshift insertion   | -   | GG | A | 17   | uncovered | yes | no  |
| X  | 48814518  | 48814518  | <i>OTUD5</i>    | frameshift insertion   | -   | C  | G | 105  | uncovered | yes | no  |
| X  | 119048674 | 119048674 | <i>AKAP14</i>   | frameshift deletion    | A   | -  | K | 92   | yes       | no  | no  |
| X  | 128782641 | 128782641 | <i>APLN</i>     | frameshift insertion   | -   | C  | R | 66   | uncovered | yes | no  |

Table S3 B: Small InDels patient 2

| chr | start     | end       | gene             | type                   | ref nt | observed nt | ref aa | aa pos | called in exome? | called in genome? | cosmic |
|-----|-----------|-----------|------------------|------------------------|--------|-------------|--------|--------|------------------|-------------------|--------|
| 1   | 38274248  | 38274248  | <i>C1orf122</i>  | frameshift insertion   | -      | G           | G      | 27     | uncovered        | yes               | no     |
| 2   | 9533687   | 9533687   | <i>ASAP2</i>     | frameshift insertion   | -      | C           | K      | 820    | uncovered        | yes               | no     |
| 2   | 42275911  | 42275911  | <i>PKDCC</i>     | frameshift insertion   | -      | G           | L      | 191    | uncovered        | yes               | no     |
| 2   | 101869561 | 101869561 | <i>C2orf29</i>   | frameshift insertion   | -      | G           | S      | 45     | uncovered        | yes               | no     |
| 2   | 102003876 | 102003876 | <i>CREG2</i>     | frameshift insertion   | -      | G           | R      | 15     | uncovered        | yes               | no     |
| 2   | 175201193 | 175201193 | <i>SP9</i>       | frameshift insertion   | -      | G           | A      | 127    | uncovered        | yes               | no     |
| 2   | 176957800 | 176957801 | <i>HOXD13</i>    | frameshift deletion    | CA     | -           |        | 61     | uncovered        | yes               | yes    |
| 2   | 230578923 | 230578923 | <i>DNER</i>      | frameshift insertion   | -      | G           | A      | 73     | uncovered        | yes               | no     |
| 3   | 57199225  | 57199227  | <i>IL17RD</i>    | nonframeshift deletion | GGA    | -           |        | 30     | uncovered        | yes               | no     |
| 3   | 118621756 | 118621756 | <i>IGSF11</i>    | frameshift deletion    | T      | -           | I      | 303    | no               | yes               | no     |
| 3   | 147128069 | 147128069 | <i>ZIC1</i>      | frameshift insertion   | -      | T           | A      | 57     | uncovered        | yes               | no     |
| 6   | 42893110  | 42893111  | <i>PTCRA</i>     | frameshift deletion    | TG     | -           |        | 179    | uncovered        | yes               | no     |
| 6   | 110679218 | 110679218 | <i>C6orf186</i>  | frameshift deletion    | G      | -           | G      | 86     | uncovered        | yes               | no     |
| 6   | 166721600 | 166721600 | <i>PRR18</i>     | frameshift deletion    | C      | -           | A      | 11     | uncovered        | yes               | no     |
| 7   | 65447139  | 65447139  | <i>GUSB</i>      | frameshift deletion    | G      | -           | A      | 11     | uncovered        | yes               | no     |
| 7   | 155532530 | 155532531 | <i>RBM33</i>     | frameshift deletion    | AG     | -           |        | 620    | uncovered        | yes               | no     |
| 8   | 25224393  | 25224398  | <i>DOCK5</i>     | nonframeshift deletion | ACAATT | -           | na     | 1044   | yes              | yes               | no     |
| 8   | 37756930  | 37756930  | <i>RAB11FIP1</i> | frameshift insertion   | -      | C           | G      | 10     | uncovered        | yes               | no     |
| 8   | 145735004 | 145735004 | <i>MFSD3</i>     | frameshift insertion   | -      | C           | G      | 96     | uncovered        | yes               | no     |
| 10  | 48438611  | 48438611  | <i>GDF10</i>     | frameshift insertion   | -      | G           | S      | 34     | uncovered        | yes               | no     |
| 11  | 1092475   | 1092475   | <i>MUC2</i>      | frameshift insertion   | -      | AT          | P      | 1432   | uncovered        | yes               | no     |
| 11  | 64565113  | 64565113  | <i>MAP4K2</i>    | frameshift deletion    | T      | -           | E      | 374    | uncovered        | yes               | no     |
| 15  | 23891258  | 23891258  | <i>MAGEL2</i>    | frameshift insertion   | -      | G           | T      | 544    | uncovered        | yes               | no     |
| 15  | 68119471  | 68119471  | <i>SKOR1</i>     | frameshift insertion   | -      | G           | G      | 391    | uncovered        | yes               | no     |
| 16  | 29818333  | 29818333  | <i>MAZ</i>       | frameshift insertion   | -      | G           | P      | 76     | uncovered        | yes               | no     |
| 17  | 636375    | 636375    | <i>FAM57A</i>    | frameshift insertion   | -      | C           | S      | 54     | uncovered        | yes               | no     |
| 17  | 4462251   | 4462251   | <i>GGT6</i>      | frameshift insertion   | -      | G           | A      | 149    | uncovered        | yes               | no     |

|    |          |          |                 |                        |     |   |   |     |           |     |     |
|----|----------|----------|-----------------|------------------------|-----|---|---|-----|-----------|-----|-----|
| 19 | 40317538 | 40317538 | <i>DYRK1B</i>   | frameshift insertion   | -   | C | G | 395 | uncovered | yes | no  |
| 20 | 25062560 | 25062560 | <i>VSX1</i>     | frameshift insertion   | -   | C | P | 58  | uncovered | yes | no  |
| 20 | 57429638 | 57429640 | <i>GNAS</i>     | nonframeshift deletion | GAT | - |   | 377 | uncovered | yes | yes |
| 20 | 62373884 | 62373884 | <i>SLC2A4RG</i> | frameshift insertion   | -   | C | R | 292 | uncovered | yes | no  |
| X  | 11682758 | 11682758 | <i>ARHGAP6</i>  | frameshift insertion   | -   | G | R | 64  | uncovered | yes | no  |

Table S4 A: Inversions patient No. 1

| <b>chromosome</b> | <b>start</b> | <b>end</b> | <b>gene</b>           |
|-------------------|--------------|------------|-----------------------|
| chr4              | 71878175     | 71955584   | <i>DCK</i>            |
| chr5              | 147553039    | 147554779  | <i>SPINK14</i>        |
| chr7              | 129066570    | 129091085  | <i>AHCYL2, FAM40B</i> |
| chr9              | 201453       | 68434529   | <i>LOC642236</i>      |
| chr14             | 91825622     | 91856306   | <i>CCDC88C</i>        |
| chr17             | 36350387     | 36406170   | <i>LOC440434</i>      |
| chr18             | 66398498     | 66399176   | <i>CCDC102B</i>       |

Table S4 B: Inversions patient No. 2

| <b>chromosome</b> | <b>start</b> | <b>end</b> | <b>gene</b>         |
|-------------------|--------------|------------|---------------------|
| chr1              | 33107241     | 33108379   | <i>ZBTB8OS</i>      |
| chr1              | 46026619     | 46056013   | <i>AKR1A1, NASP</i> |
| chr1              | 58581661     | 58592142   | <i>DAB1</i>         |
| chr1              | 119569249    | 119600947  | <i>WARS2</i>        |
| chr3              | 37553372     | 37553456   | <i>ITGA9</i>        |
| chr3              | 106918402    | 106919564  | <i>LOC100302640</i> |
| chr4              | 66275067     | 66348582   | <i>EPHA5</i>        |
| chr4              | 79031136     | 79035783   | <i>FRAS1</i>        |
| chr5              | 43213865     | 43213953   | <i>NIM1</i>         |
| chr5              | 147553039    | 147554616  | <i>SPINK14</i>      |
| chr6              | 57403534     | 57410135   | <i>PRIM2</i>        |
| chr6              | 73042386     | 73047307   | <i>RIMS1</i>        |
| chr6              | 74193716     | 74193781   | <i>MTO1</i>         |
| chr7              | 73531412     | 73534012   | <i>LIMK1</i>        |
| chr7              | 83184322     | 83191781   | <i>SEMA3E</i>       |

|       |          |          |                 |
|-------|----------|----------|-----------------|
| chr10 | 78801102 | 78882773 | <i>KCNMA1</i>   |
| chr10 | 87963306 | 87967672 | <i>GRID1</i>    |
| chr11 | 47505799 | 47505871 | <i>CELF1</i>    |
| chr11 | 72702282 | 72702339 | <i>FCHSD2</i>   |
| chr12 | 25327274 | 25327342 | <i>CASC1</i>    |
| chr12 | 25718424 | 25749850 | <i>IFLTD1</i>   |
| chr12 | 66321678 | 66321734 | <i>HMGA2</i>    |
| chr12 | 71251513 | 71251579 | <i>PTPRR</i>    |
| chr12 | 78394308 | 78394758 | <i>NAV3</i>     |
| chr13 | 28815776 | 28815852 | <i>PAN3</i>     |
| chr14 | 37771227 | 37771306 | <i>MIPOL1</i>   |
| chr17 | 78727180 | 78727267 | <i>RPTOR</i>    |
| chr18 | 32588783 | 32588873 | <i>MAPRE2</i>   |
| chr18 | 66572493 | 66578708 | <i>CCDC102B</i> |

Table S4 C: Interchromosomal translocations patient No. 1

| breakpoint 1 |           | breakpoint 2 |           | genes            |
|--------------|-----------|--------------|-----------|------------------|
| chromosome   | position  | chromosome   | position  |                  |
| chr1         | 38432782  | chr6         | 28863596  | <i>SF3A3</i>     |
| chr1         | 168025482 | chr19        | 24033171  | <i>DCAF6</i>     |
| chr2         | 133012697 | chr12        | 20704282  | <i>ANKRD30BL</i> |
| chr3         | 196625679 | chr10        | 42596810  | <i>SENP5</i>     |
| chr5         | 58988375  | chr7         | 80801716  | <i>PDE4D</i>     |
| chr5         | 68499842  | chrX         | 53054452  | <i>CENPH</i>     |
| chr6         | 24684231  | chr22        | 32928263  | <i>ACOT13</i>    |
| chr6         | 144120812 | chr7         | 153001941 | <i>PHACTR2</i>   |
| chr7         | 81789152  | chr10        | 60902558  | <i>CACNA2D1</i>  |
| chr7         | 87255610  | chrX         | 97409704  | <i>ABCB1</i>     |



|       |          |       |           |                        |
|-------|----------|-------|-----------|------------------------|
| chr10 | 68672793 | chr16 | 59976458  | <i>CTNNA3</i>          |
| chr10 | 73519977 | chr11 | 115199242 | <i>C10orf54, CDH23</i> |
| chr12 | 56989998 | chr15 | 39994382  | <i>BAZ2A</i>           |

Table S4 D: Interchromosomal translocations patient No. 2

| breakpoint 1 |           | breakpoint 2 |           | genes            |
|--------------|-----------|--------------|-----------|------------------|
| chromosome   | Position  | chromosome   | position  |                  |
| chr1         | 24999672  | chr8         | 128100486 | <i>SRRM1</i>     |
| chr5         | 21474750  | chr6         | 58272103  | <i>GUSBP1</i>    |
| chr5         | 112669294 | chr6         | 40177372  | <i>MCC</i>       |
| chr5         | 79074210  | chr12        | 25780056  | <i>CMYA5</i>     |
| chr6         | 20112057  | chr9         | 117857675 | <i>MBOAT1</i>    |
| chr7         | 111053279 | chr12        | 108203016 | <i>IMMP2L</i>    |
| chr7         | 147472362 | chr17        | 35072033  | <i>CNTNAP2</i>   |
| chr7         | 151970937 | chr21        | 11058238  | <i>MLL3</i>      |
| chr8         | 52730378  | chr11        | 38812394  | <i>PCMTD1</i>    |
| chr9         | 68429385  | chr20        | 29632249  | <i>LOC642236</i> |
| chr9         | 117857835 | chr20        | 37093067  | <i>TNC</i>       |
| chr17        | 45264766  | chr22        | 20062765  | <i>CDG27</i>     |
| chr19        | 19632268  | chr22        | 16347238  | <i>NDUFA13</i>   |
| chr19        | 49810907  | chrX         | 144519280 | <i>SLC6A16</i>   |

Table S4 E: Deletions patient No. 1

| chromosome | deletion start | deletion end | gene            | # deletions | avg. deletion length |
|------------|----------------|--------------|-----------------|-------------|----------------------|
| chr5       | 19847034       | 19867791     | <i>CDH18</i>    | 2           | 23.00                |
| chr5       | 21527908       | 21569501     | <i>GUSBP1</i>   | 9           | 11.44                |
| chr5       | 21855682       | 22715926     | <i>CDH12</i>    | 4           | 10.50                |
| chr5       | 40794615       | 40794979     | <i>PRKAA1</i>   | 1           | 363.00               |
| chr5       | 52172144       | 52232105     | <i>ITGA1</i>    | 4           | 103.00               |
| chr5       | 58277277       | 59541862     | <i>PDE4D</i>    | 9           | 16.56                |
| chr5       | 70853481       | 70853549     | <i>BDP1</i>     | 1           | 67.00                |
| chr5       | 75435663       | 75561971     | <i>SV2C</i>     | 3           | 47.33                |
| chr5       | 77004046       | 77062619     | <i>TBCA</i>     | 2           | 160.50               |
| chr5       | 78277726       | 78278046     | <i>ARSB</i>     | 1           | 319.00               |
| chr5       | 80039371       | 80039681     | <i>MSH3</i>     | 1           | 309.00               |
| chr5       | 80838449       | 81008438     | <i>SSBP2</i>    | 2           | 140.50               |
| chr5       | 88032012       | 88032343     | <i>MEF2C</i>    | 1           | 330.00               |
| chr5       | 89918620       | 90351220     | <i>GPR98</i>    | 4           | 10.25                |
| chr5       | 93757792       | 93916621     | <i>KIAA0825</i> | 2           | 174.00               |
| chr5       | 101796603      | 101796650    | <i>SLCO6A1</i>  | 1           | 46.00                |
| chr5       | 110584044      | 110709132    | <i>CAMK4</i>    | 4           | 85.50                |
| chr5       | 115781960      | 115894458    | <i>SEMA6A</i>   | 2           | 163.50               |
| chr5       | 122701699      | 122727303    | <i>CEP120</i>   | 3           | 25.67                |
| chr5       | 136604692      | 136783317    | <i>SPOCK1</i>   | 2           | 27.50                |
| chr5       | 137022562      | 137023887    | <i>KLHL3</i>    | 1           | 1324.00              |
| chr5       | 147462155      | 147462472    | <i>SPINK5</i>   | 1           | 316.00               |
| chr5       | 149746191      | 149746518    | <i>TCOF1</i>    | 1           | 326.00               |
| chr5       | 152986428      | 152986521    | <i>GRIA1</i>    | 1           | 92.00                |
| chr5       | 154315917      | 154316003    | <i>GEMIN5</i>   | 1           | 85.00                |
| chr5       | 158592397      | 158592743    | <i>RNF145</i>   | 1           | 345.00               |
| chr5       | 170092722      | 170158907    | <i>KCNIP1</i>   | 2           | 50.00                |

|      |           |           |                  |    |         |
|------|-----------|-----------|------------------|----|---------|
| chr6 | 38498278  | 38498416  | <i>BTBD9</i>     | 1  | 137.00  |
| chr6 | 38720386  | 38932857  | <i>DNAH8</i>     | 4  | 93.25   |
| chr6 | 41953350  | 41995188  | <i>CCND3</i>     | 2  | 162.50  |
| chr6 | 45063196  | 45180261  | <i>SUPT3H</i>    | 2  | 25.00   |
| chr6 | 45927255  | 45967786  | <i>CLIC5</i>     | 4  | 88.75   |
| chr6 | 51736109  | 51904144  | <i>PKHD1</i>     | 2  | 351.00  |
| chr6 | 55337265  | 55408298  | <i>HMGCLL1</i>   | 4  | 81.75   |
| chr6 | 57207690  | 57489304  | <i>PRIM2</i>     | 48 | 252.25  |
| chr6 | 62410046  | 62835931  | <i>KHDRBS2</i>   | 5  | 11.40   |
| chr6 | 64794896  | 66290505  | <i>EYS</i>       | 14 | 164.50  |
| chr6 | 69648332  | 70043874  | <i>BAI3</i>      | 5  | 19.40   |
| chr6 | 74421253  | 74501003  | <i>CD109</i>     | 3  | 107.00  |
| chr6 | 76716172  | 76746584  | <i>IMPG1</i>     | 2  | 50.50   |
| chr6 | 89449444  | 89449487  | <i>RNGTT</i>     | 1  | 42.00   |
| chr6 | 91237575  | 91237897  | <i>MAP3K7</i>    | 1  | 321.00  |
| chr6 | 102030791 | 102357886 | <i>GRIK2</i>     | 4  | 13.25   |
| chr6 | 105567837 | 105568173 | <i>BVES</i>      | 1  | 335.00  |
| chr6 | 106966857 | 106986043 | <i>AIM1</i>      | 4  | 86.50   |
| chr6 | 108031342 | 108032403 | <i>SCML4</i>     | 1  | 1060.00 |
| chr6 | 116630476 | 116751133 | <i>DSE</i>       | 2  | 163.50  |
| chr6 | 123624457 | 123897619 | <i>TRDN</i>      | 5  | 10.80   |
| chr6 | 124234027 | 125119226 | <i>NKAIN2</i>    | 6  | 34.17   |
| chr6 | 134811194 | 134817663 | <i>LOC154092</i> | 2  | 168.50  |
| chr6 | 137313693 | 137314187 | <i>NHEG1</i>     | 1  | 493.00  |
| chr6 | 143138010 | 143161521 | <i>HIVEP2</i>    | 3  | 37.67   |
| chr6 | 153029971 | 153033790 | <i>MYCT1</i>     | 1  | 3818.00 |
| chr6 | 154446915 | 154447238 | <i>OPRM1</i>     | 1  | 322.00  |
| chr6 | 157957840 | 157958148 | <i>ZDHHC14</i>   | 1  | 307.00  |
| chr6 | 158548266 | 158549067 | <i>SERAC1</i>    | 1  | 800.00  |

|      |           |           |                  |    |        |
|------|-----------|-----------|------------------|----|--------|
| chr6 | 161795638 | 163140940 | <i>PARK2</i>     | 6  | 18.33  |
| chr6 | 169905557 | 170038446 | <i>WDR27</i>     | 2  | 210.00 |
| chr7 | 69094157  | 70093358  | <i>AUTS2</i>     | 4  | 25.75  |
| chr7 | 70852212  | 71166844  | <i>WBSCR17</i>   | 4  | 19.25  |
| chr7 | 71398080  | 71828232  | <i>CALN1</i>     | 7  | 13.43  |
| chr7 | 77692552  | 78955527  | <i>MAGI2</i>     | 15 | 44.00  |
| chr7 | 81358337  | 81380822  | <i>HGF</i>       | 2  | 141.50 |
| chr7 | 81590035  | 81904509  | <i>CACNA2D1</i>  | 4  | 13.50  |
| chr7 | 83019539  | 83251598  | <i>SEMA3E</i>    | 5  | 15.80  |
| chr7 | 83653800  | 83724687  | <i>SEMA3A</i>    | 4  | 110.75 |
| chr7 | 86836614  | 86836924  | <i>C7orf23</i>   | 1  | 309.00 |
| chr7 | 93169987  | 93170105  | <i>CALCR</i>     | 1  | 117.00 |
| chr7 | 101521036 | 101911193 | <i>CUX1</i>      | 3  | 16.33  |
| chr7 | 102488704 | 102607726 | <i>FBXL13</i>    | 3  | 117.67 |
| chr7 | 103231015 | 103614941 | <i>RELN</i>      | 6  | 62.83  |
| chr7 | 104187384 | 104347403 | <i>LHFPL3</i>    | 3  | 115.33 |
| chr7 | 105733990 | 105734329 | <i>SYPL1</i>     | 1  | 338.00 |
| chr7 | 110536533 | 110543010 | <i>IMMP2L</i>    | 2  | 256.50 |
| chr7 | 113867592 | 114154152 | <i>FOXP2</i>     | 5  | 14.80  |
| chr7 | 120881096 | 120881435 | <i>C7orf58</i>   | 1  | 338.00 |
| chr7 | 121963925 | 122346024 | <i>CADPS2</i>    | 7  | 52.86  |
| chr7 | 126301958 | 126775701 | <i>GRM8</i>      | 3  | 36.00  |
| chr7 | 131813284 | 132279786 | <i>PLXNA4</i>    | 4  | 13.25  |
| chr7 | 134349999 | 134350423 | <i>BPGM</i>      | 1  | 423.00 |
| chr7 | 134475804 | 134490463 | <i>CALD1</i>     | 2  | 22.00  |
| chr7 | 136739075 | 136845672 | <i>LOC349160</i> | 3  | 105.33 |
| chr7 | 144382749 | 144382898 | <i>TPK1</i>      | 1  | 148.00 |
| chr7 | 146174662 | 148076324 | <i>CNTNAP2</i>   | 8  | 468.00 |
| chr7 | 151397836 | 151516844 | <i>PRKAG2</i>    | 4  | 11.00  |

|      |           |           |               |    |       |
|------|-----------|-----------|---------------|----|-------|
| chr7 | 152099668 | 152109219 | <i>MLL3</i>   | 16 | 15.69 |
| chr7 | 157870222 | 158266488 | <i>PTPRN2</i> | 7  | 17.29 |
| chr7 | 158563013 | 158574681 | <i>ESYT2</i>  | 2  | 87.00 |

Table S4 F: Deletions patient No. 2

| <b>chromosome</b> | <b>deletion start</b> | <b>deletion end</b> | <b>gene</b>     | <b># deletions</b> | <b>avg. deletion length</b> |
|-------------------|-----------------------|---------------------|-----------------|--------------------|-----------------------------|
| chr8              | 9636709               | 9638499             | <i>TNKS</i>     | 1                  | 1789.00                     |
| chr11             | 61107785              | 61108125            | <i>DAK</i>      | 1                  | 339.00                      |
| chr12             | 23741655              | 24460697            | <i>SOX5</i>     | 3                  | 100.67                      |
| chr12             | 129088970             | 129089092           | <i>TMEM132C</i> | 1                  | 121.00                      |

Table S5: Clinico-pathological characteristics of patients with a GNAS-mutation

| Patient No. | Gender | Age | Tumor type   | Tumor stage                     | MSI*  | GNAS Exon 8      | GNAS Exon 9 |
|-------------|--------|-----|--------------|---------------------------------|-------|------------------|-------------|
| 3           | male   | 88  | intestinal   | pT2 N0 (0/15) M0 L0 V0 G2 R0    | MSI-H | p.R201H c.602G>A | wt          |
| 4           | male   | 65  | intestinal   | pT3 N3b (16/31) M0 L0 V1 G2 R0  | MSS   | p.R201C c.601C>T | wt          |
| 5           | male   | 67  | intestinal   | pT1a N0 (0/10) M0 L0 V0 G1 R0   | MSS   | p.R201H c.602G>A | wt          |
| 6           | male   | 82  | intestinal   | pT3 N2 (3/21) M0 L1 V1 G2 R0    | MSI-H | p.R201H c.602G>A | wt          |
| 7           | male   | 56  | diffuse      | pT4b N3b (23/23) M1 L1 V0 G3 R1 | MSS   | p.R201L c.602G>T | wt          |
| 8           | male   | 73  | diffuse      | pT3 N2 (6/18) M0 L0 V0 G3 R0    | n.a.  | p.R201H c.602G>A | wt          |
| 9           | male   | 55  | unclassified | pT4b N0 (0/27) M0 L0 V0 G3 R0   | MSI-H | p.R201H c.602G>A | wt          |

\*MSI-H: highly microsatellite unstable; MSS: microsatellite stable; n.a.: not applicable

Table S6 Allele calls of failed validations (MSI tumor)

| chr. | position  | gene   | allele counts WES patient 1 tumor (MSI) |    |    |    |    |         | allele counts WES patient 1 non-tumor |    |    |    |    |         | allele counts WGS patient 1 tumor (MSI) |    |    |    |    |         | allele counts WGS patient 1 non-tumor |    |     |    |    |         |
|------|-----------|--------|-----------------------------------------|----|----|----|----|---------|---------------------------------------|----|----|----|----|---------|-----------------------------------------|----|----|----|----|---------|---------------------------------------|----|-----|----|----|---------|
|      |           |        | cov.                                    | #A | #C | #G | #T | %allele | cov.                                  | #A | #C | #G | #T | %allele | cov.                                    | #A | #C | #G | #T | %allele | cov.                                  | #A | #C  | #G | #T | %allele |
| 11   | 47296590  | MADD   | 43                                      | 0  | 1  | 9  | 33 | 20.93   | 42                                    | 0  | 0  | 1  | 41 | 2.38    | 42                                      | 0  | 0  | 0  | 42 | 0       | 53                                    | 0  | 2   | 0  | 51 | 3.77    |
| 12   | 54369186  | HOXC11 | 12                                      | 0  | 8  | 4  | 0  | 33.33   | 21                                    | 0  | 19 | 2  | 0  | 9.52    | 36                                      | 0  | 36 | 0  | 0  | 0       | 84                                    | 0  | 84  | 0  | 0  | 0       |
| 9    | 36966598  | PAX5   | 15                                      | 4  | 11 | 0  | 0  | 26.67   | 22                                    | 1  | 21 | 0  | 0  | 4.55    | 39                                      | 0  | 39 | 0  | 0  | 0       | 57                                    | 0  | 57  | 0  | 0  | 0       |
| 17   | 56439928  | RNF43  | 13                                      | 9  | 0  | 4  | 0  | 30.77   | 16                                    | 15 | 0  | 1  | 0  | 6.25    | 46                                      | 43 | 2  | 1  | 0  | 4.35    | 54                                    | 45 | 4   | 5  | 0  | 9.26    |
| 14   | 70990319  | ADAM20 | 49                                      | 6  | 43 | 0  | 0  | 12.24   | 47                                    | 3  | 43 | 0  | 1  | 6.38    | 47                                      | 0  | 47 | 0  | 0  | 0       | 85                                    | 0  | 85  | 0  | 0  | 0       |
| 4    | 38800365  | TLR1   | 41                                      | 8  | 33 | 0  | 0  | 19.51   | 33                                    | 5  | 28 | 0  | 0  | 15.15   | 56                                      | 0  | 56 | 0  | 0  | 0       | 107                                   | 1  | 106 | 0  | 0  | 0.93    |
| 2    | 222428603 | EPHA4  | 66                                      | 0  | 0  | 56 | 10 | 15.15   | 94                                    | 0  | 0  | 82 | 12 | 12.77   | 63                                      | 0  | 0  | 63 | 0  | 0       | 82                                    | 1  | 0   | 81 | 0  | 1.22    |
| 7    | 120614861 | ING3   | 28                                      | 0  | 22 | 6  | 0  | 21.43   | 30                                    | 2  | 26 | 2  | 0  | 6.67    | 67                                      | 0  | 67 | 0  | 0  | 0       | 115                                   | 0  | 115 | 0  | 0  | 0       |

Table S7 Allele calls of failed validations (MSS tumor)

| chr. | position  | gene   | allele counts WES patient 2 tumor (MSS) |    |    |    |    |         | allele counts WES patient 2 non-tumor |    |    |    |    |         | allele counts WGS patient 2 tumor (MSS) |    |    |    |    |         | allele counts WGS patient 2 non-tumor |    |    |    |    |         |
|------|-----------|--------|-----------------------------------------|----|----|----|----|---------|---------------------------------------|----|----|----|----|---------|-----------------------------------------|----|----|----|----|---------|---------------------------------------|----|----|----|----|---------|
|      |           |        | cov.                                    | #A | #C | #G | #T | %allele | cov.                                  | #A | #C | #G | #T | %allele | cov.                                    | #A | #C | #G | #T | %allele | cov.                                  | #A | #C | #G | #T | %allele |
| 12   | 54369186  | HOXC11 | 19                                      | 0  | 16 | 3  | 0  | 15.79   | 23                                    | 0  | 22 | 1  | 0  | 4.35    | 28                                      | 1  | 27 | 0  | 0  | 3.57    | 24                                    | 0  | 24 | 0  | 0  | 0       |
| 9    | 36966598  | PAX5   | 19                                      | 5  | 14 | 0  | 0  | 26.32   | 11                                    | 0  | 11 | 0  | 0  | 0       | 12                                      | 0  | 12 | 0  | 0  | 0       | 37                                    | 0  | 37 | 0  | 0  | 0       |
| 17   | 56439928  | RNF43  | 26                                      | 19 | 0  | 7  | 0  | 26.92   | 14                                    | 14 | 0  | 0  | 0  | 0       | 16                                      | 14 | 0  | 2  | 0  | 12.5    | 37                                    | 31 | 4  | 2  | 0  | 10.81   |
| 14   | 70990319  | ADAM20 | 52                                      | 11 | 39 | 0  | 2  | 21.15   | 54                                    | 5  | 46 | 1  | 2  | 9.26    | 41                                      | 0  | 41 | 0  | 0  | 0       | 55                                    | 0  | 55 | 0  | 0  | 0       |
| 4    | 38800365  | TLR1   | 29                                      | 4  | 25 | 0  | 0  | 13.79   | 32                                    | 2  | 30 | 0  | 0  | 6.25    | 28                                      | 0  | 28 | 0  | 0  | 0       | 57                                    | 0  | 56 | 0  | 1  | 1.75    |
| 2    | 222428603 | EPHA4  | 98                                      | 0  | 0  | 82 | 16 | 16.33   | 70                                    | 0  | 1  | 62 | 7  | 10      | 29                                      | 0  | 0  | 29 | 0  | 0       | 43                                    | 1  | 0  | 42 | 0  | 2.33    |
| 7    | 120614861 | ING3   | 25                                      | 0  | 16 | 9  | 0  | 36      | 31                                    | 0  | 28 | 3  | 0  | 9.68    | 29                                      | 0  | 29 | 0  | 0  | 0       | 44                                    | 0  | 42 | 1  | 1  | 2.27    |

Table S8 Putative insert position with adjacent gene < 100kb

| <b>chromosome</b> | <b>range start</b> | <b>range end</b> | <b>closest gene</b>   | <b>distance to closest gene</b> |
|-------------------|--------------------|------------------|-----------------------|---------------------------------|
| chr2              | 92103056           | 92103061         | <i>ACTR3BP2</i>       | 26098                           |
| chr7              | 141743389          | 141743389        | <i>MGAM</i>           | intronic                        |
| chr7              | 57688147           | 57688147         | <i>L37717</i>         | 10499                           |
| chr7              | 57760881           | 57760881         | <i>L37717</i>         | 62077                           |
| chr7              | 57786314           | 57786314         | <i>L37717</i>         | 87510                           |
| chr9              | 40407198           | 40407198         | <i>CNTNAP3B</i>       | 91283                           |
| chr9              | 41897881           | 41897886         | <i>BC019880/GLIDR</i> | 50628                           |
| chr9              | 42084498           | 42084498         | <i>LOC554249</i>      | 64085                           |
| chr9              | 44460316           | 44460321         | <i>LOC103908605</i>   | 57056                           |
| chr9              | 45607139           | 45607139         | <i>LOC100132167</i>   | 43576                           |
| chr9              | 46900844           | 46900849         | <i>LOC103908605</i>   | 55685                           |
| chr16             | 33109610           | 33109613         | abParts               | intronic                        |
| chr20             | 26255314           | 26255315         | <i>LOC284801</i>      | 65445                           |

Table S9 Number of called somatic SNVs

| <b>sample</b> | <b># called SNVs</b> |
|---------------|----------------------|
| MSI WGS       | 19784                |
| MSS WGS       | 5116                 |
| MSI WES       | 965                  |
| MSS WES       | 2722                 |
